# Supplementary material for: Modular fluorescence complementation sensors for live cell detection of epigenetic signals at endogenous genomic sites
Source: PubMed Central journal article supplement (PMC5608954; doi:10.1038/s41467-017-00457-z), 2017-09-21
Supplement: 41467_2017_457_MOESM2_ESM.pdf [file 41467_2017_457_MOESM2_ESM.pdf]

## **Description of Supplementary Files**

### **Title: Supplementary Information**

Description: Supplementary Figures, Supplementary Tables, and Supplementary References

### **Title: Peer Review File**

## Supplemental figures and figure legends

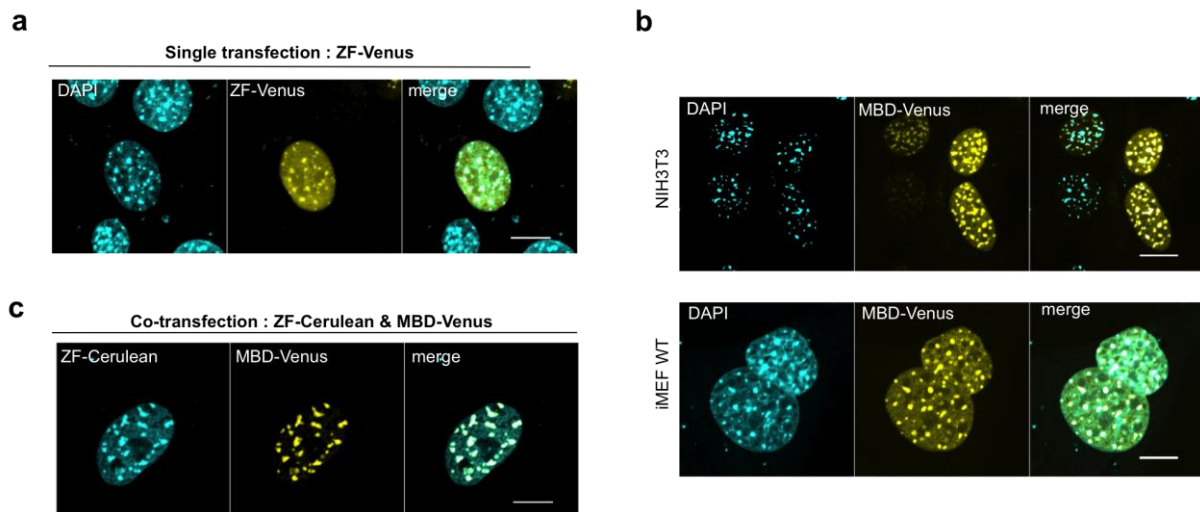

**Supplementary Figure 1: Selection and validation of BiAD 1 sensor modules (a)** Representative fluorescent microscopy image documenting the colocalization of the Venus-fused ZF with mouse pericentrometric heterochromatin, detected by DAPI co-staining. **(b)** Representative fluorescent microscopy image documenting that the MBD-Venus fusion shows specific enrichment at DAPI-dense heterochromatic foci in NIH3T3 (top panel) and iMEF (bottom panel) cells. **(c)** Representative fluorescence microscopy image documenting that both the ZF and the MBD module can simultaneously bind at the same target sites as indicated by the co-localization of the BiAD modules in co-transfection experiments. Scale bar for all images is 10  $\mu\text{m}$ . This figure refers to Fig. 2.

**a****Single transfection : ZF-VenN**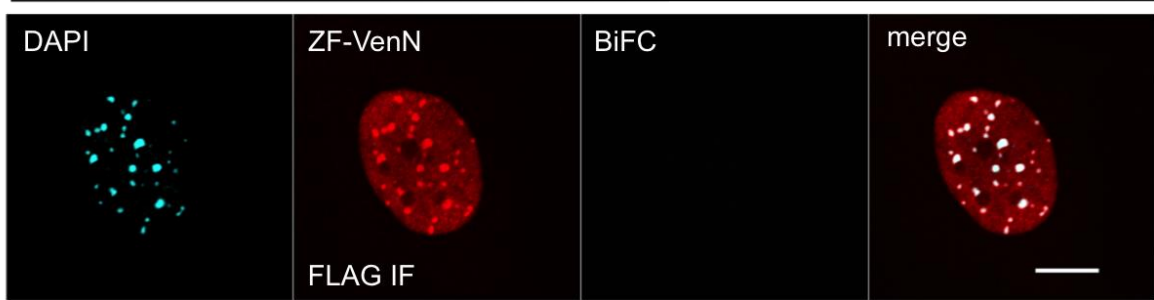**b****Single transfection : MBD-VenC**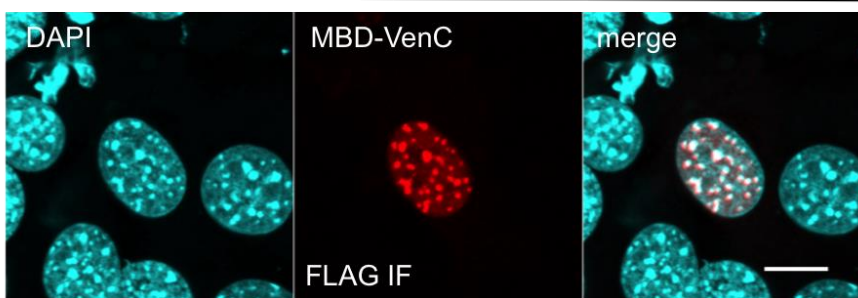

**Supplementary Figure 2: Fusion of the BiAD 1 sensor modules with the split Venus fragments does not alter the cellular localization of the modules and does not give rise to background fluorescence.** (a) Representative fluorescence microscopy image documenting that the split fluorophore-fused ZF module maintains its localization at DAPI dense foci. Furthermore, no residual fluorescence is observed in the BiFC channel documenting that the reconstitution of the fluorophore is mandatory for signal detection under these imaging settings. This is an important control since the Venus chromophore is located in the VenN part. The expression of the construct was detected by anti-FLAG immunofluorescence. (b) Anti-FLAG immunofluorescence image demonstrating that the 5mC specificity of the MBD is maintained upon its fusion with the VenC fragment as the construct maintains its localization to 5mC rich chromocenters. Scale bar is 10  $\mu$ m. This figure refers to Fig. 2.

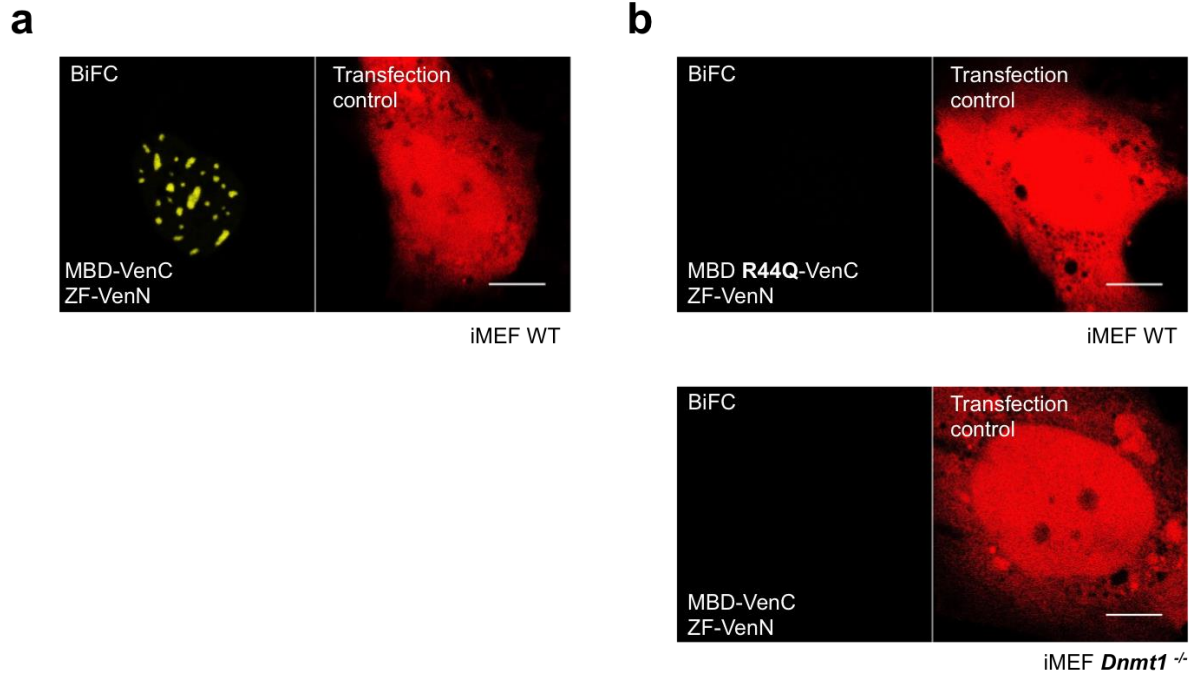

**Supplementary Figure 3: The fluorescent signal produced by the BiAD sensor 1 is specific and can be detected by live cell microscopy.** (a) Representative fluorescence microscopy image of live iMEF cells after transfection with the modules of the BiAD sensor 1. The bimolecular fluorescence complementation (BiFC) signal is shown in yellow. (b) Representative fluorescence microscopy images documenting the 5mC specificity of the BiAD 1 sensor under live cell imaging conditions. Upper panel: iMEF cells were transfected with the BiAD sensor where the MBD R44Q construct was used as detector module. Lower panel: DNMT1 deficient iMEF cells were transfected with the BiAD 1 modules. In both cases no signal is observed in the BiFC channel. Imaging was performed at 48 h after transfection. A plasmid encoding NLS-mRuby2 was used to identify transfected cells (red channel). Scale bar is 10  $\mu\text{m}$ . This figure refers to Fig. 2.

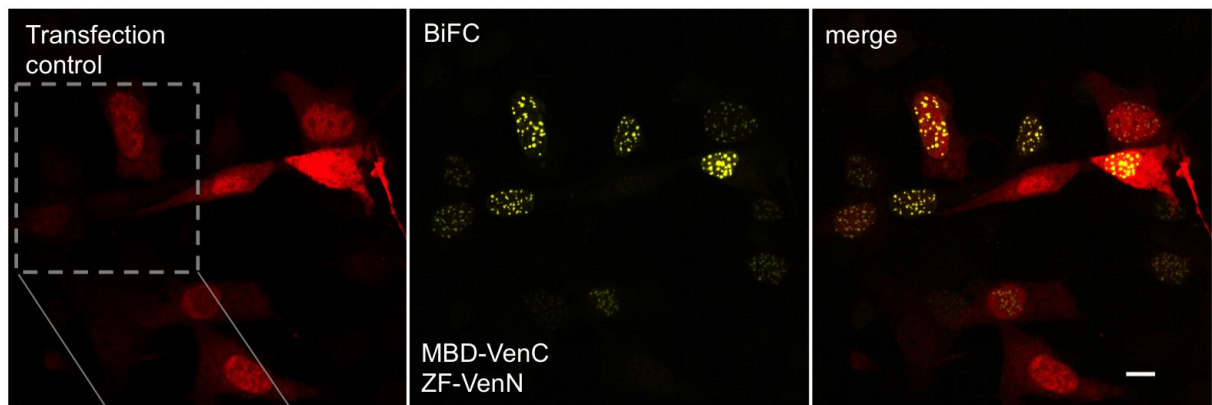

iMEF WT

**Supplementary Figure 4: BiAD sensor 1 shows a high fluorescence reconstitution yield when transfected in mouse fibroblasts.** Zoom out fluorescence microscopy image documenting that BiAD sensor 1 gives rise to a strong BiFC signals in a large proportion of the transfected cells, identified based on the red fluorescence of the NLS-mRuby2 transfection marker. The modules of the sensor and the transfection marker were expressed from separate plasmids, leading to a lack of strong correlation between the intensity of the fluorescence observed in the transfection control channel and the BiFC yield (see also Methods section). The zoom in area shows a group of cells for which the contrast was adjusted such that the low NLS-mRuby2 expressing cells become visible. The transfection, imaging and display setting of this image are identical to those of Supplementary Figs. 6 and 8. This figure refers to Fig. 2. Scale bar 10  $\mu$ m.

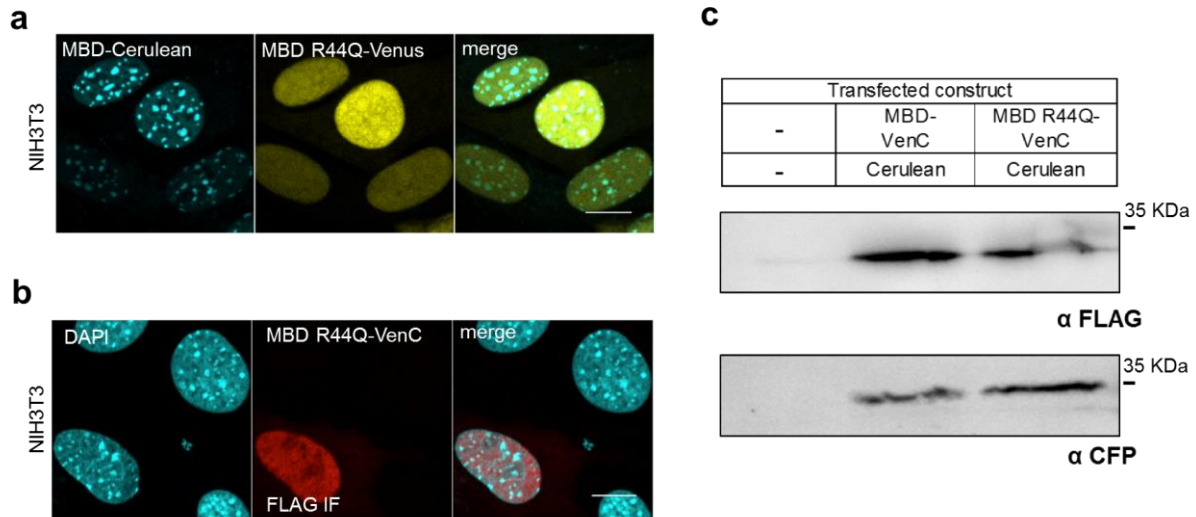

**Supplementary Figure 5: Establishment of the MBD R44Q variant to validate the 5mC specificity of the DNA methylation biosensors.** (a) Fluorescence microscopy images showing that the sub-nuclear localization pattern of the R44Q MBD domain mutant in mouse fibroblasts differs from that of the WT. (b) Anti-FLAG immunofluorescence images demonstrating that the diffuse localization of the MBD R44Q, thus its lack of binding pericentromeric 5mC marks, is maintained upon fusing the domain with the VenC fragment. (c) The R44Q mutation does not influence the expression and protein stability of the MBD-VenC fusion, as determined by Western blot with lysates of transfected cells. Co-transfection with mCerulean was used to normalize for differences in transfection efficiency. For detection of mCerulean expression, the same volumes of lysates as used in the anti-FLAG western blot were loaded on a separate SDS-PAGE. Lysate of un-transfected cells was loaded in the first lane. Scale bar for all images is 10  $\mu$ m. This figure refers to Fig. 2.

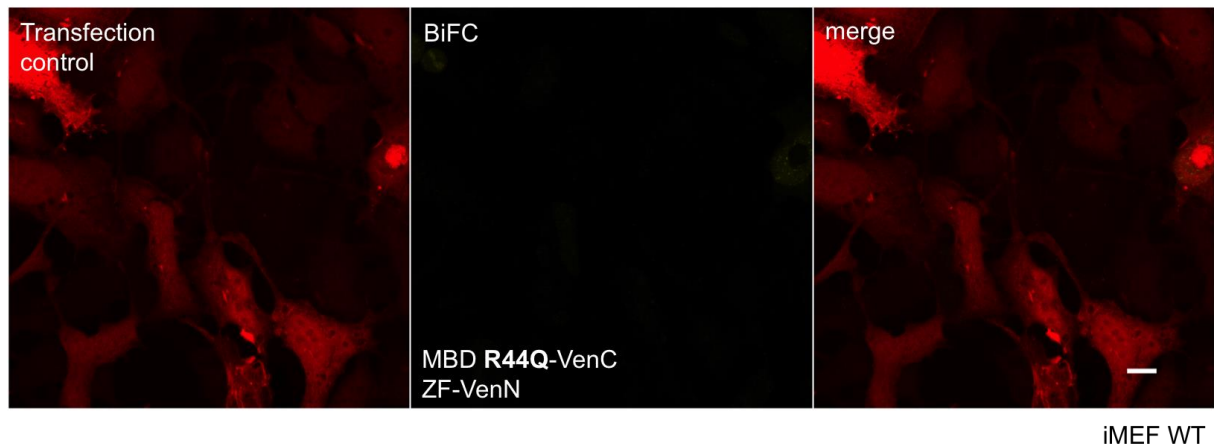

**Supplementary Figure 6: Validation of the 5mC specificity of the BiAD sensor 1 by using the MBD R44Q variants as a detector module.** Zoom out fluorescence microscopy image documenting that BiAD sensor 1 gives rise to only very weak BiFC signals when the R44Q variant is used instead of the WT MBD as a detector module. NLS-mRuby2 was used to identify transfected cells (red channel). The transfection, imaging and display setting of this image are identical to those of Supplementary Figs. 4 and 8. Scale bar 10  $\mu$ m. This figure refers to Fig. 2.

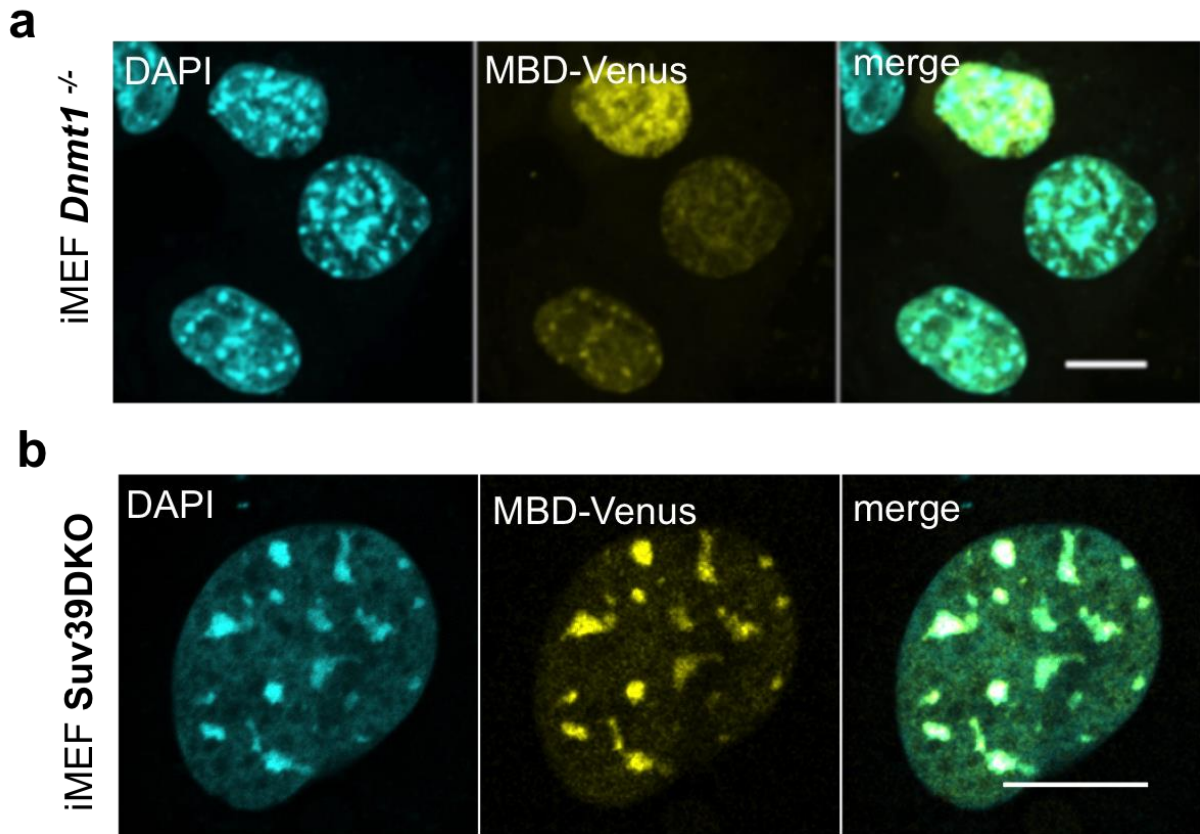

**Supplementary Figure 7: Quality control of the 5mC detector module. (a)** In DNMT1-deficient iMEF cells, the MBD of MBD1 is no longer enriched at DAPI stained pericentromeric repeats. **(b)** By contrast, in *Suv39H1* and *H2* double knock out cells (*Suv39DKO*) which are depleted in H3K9me3 but retain high 5mC levels<sup>1,2</sup>, no changes in the localization of the MBD domain were observed. This indicates the localization of the MBD detector is directly dependent on the presence of the 5mC modification and is not influenced by chromatin organisation. Scale bar 10  $\mu$ m. This figure refers to Fig. 2.



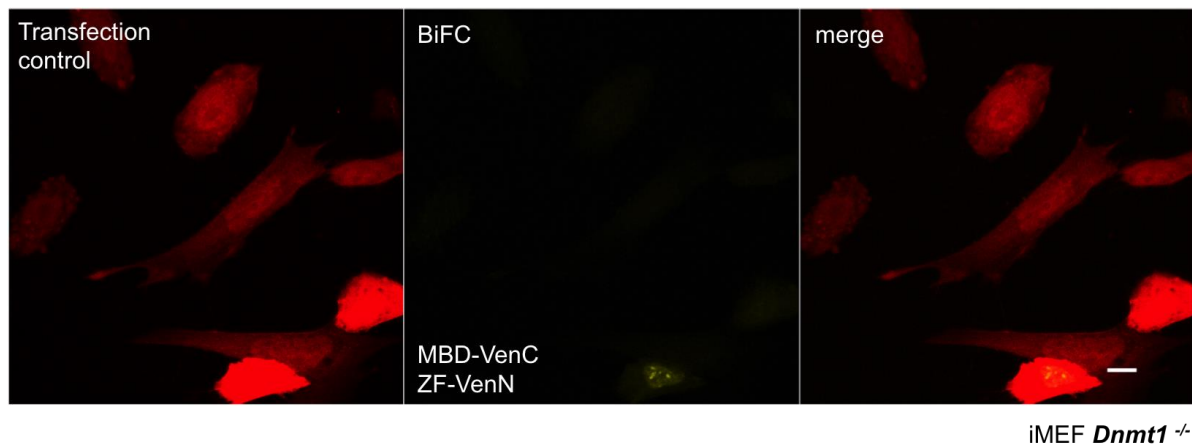

**Supplementary Figure 8: Validation of the 5mC specificity of BiAD sensor 1 in DNMT1 deficient mouse fibroblasts.** Zoom out fluorescence microscopy image documenting that BiAD sensor 1 only gives rise to very weak BiFC signals when transfected into cells with reduced DNA methylation. NLS-mRuby2 was used to identify transfected cells (red channel). The transfection, imaging and display setting of this image are identical to those of Supplementary Figs. 4 and 6. Scale bar 10  $\mu$ m. This figure refers to Fig.2.

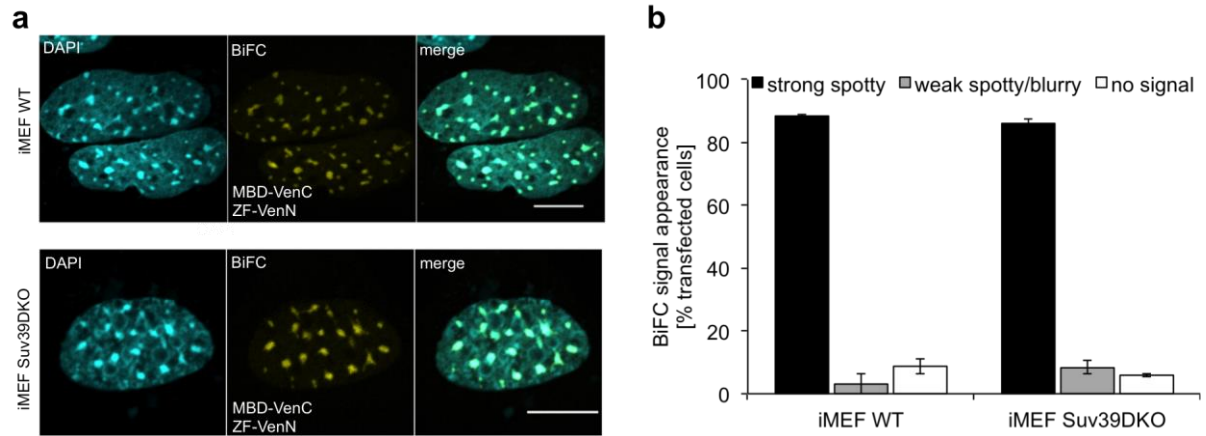

**Supplementary Figure 9: 5mC readout by the BiAD sensor 1 is independent of changes in H3K9me3 levels.** (a) Fluorescence microscopy images documenting comparable strong BiFC signals of the 5mC-specific BiAD sensor 1 in WT iMEF (top panel) and Suv39DKO iMEF cells (bottom panel). Scale bar for all images is 10  $\mu$ m. The cells were fixed 48 h after transfection, the imaging and display setting are identical between the 2 panels of the figure. (b) Quantification of the experiments representatively shown in panel a. For details cf. Supplementary Tables 1, 6 and 7. Figure refers to Figs. 2d and 6c. Error bars show the s.e.m. of two independent biological replicated.

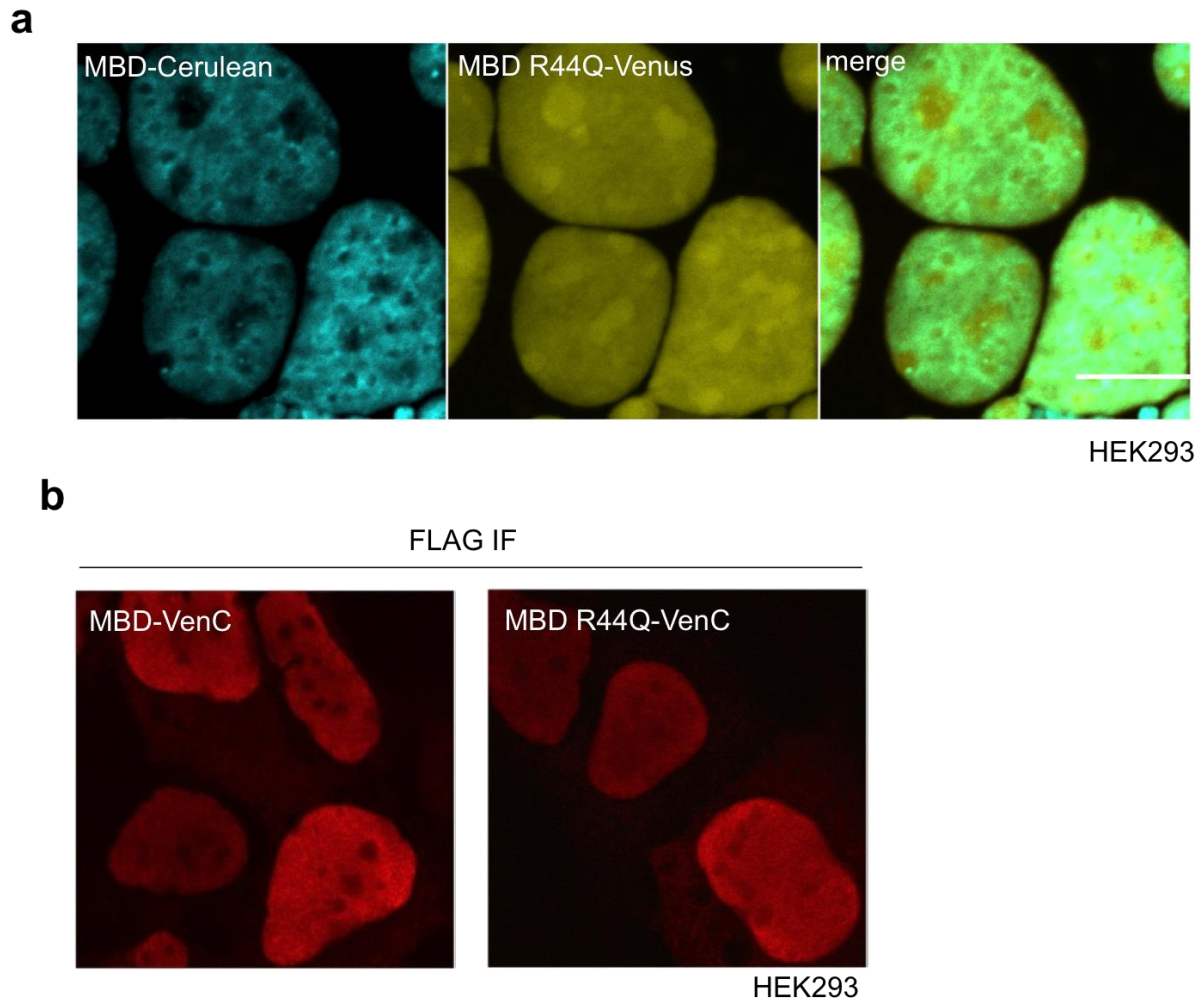

**Supplementary Figure 10: The 5mC sensor used in BiAD sensor 1 can be incorporated in BiAD sensor 2.** (a) Fluorescence microscopy image showing that the sub-nuclear localization pattern of the R44Q MBD domain mutant in HEK293 cells differs from that of the WT protein similarly as observed in NIH3T3 cells (Supplementary Fig.5a). (b) Anti-FLAG immunofluorescence images demonstrating that the VenC fusion does not affect the localization of the WT (left panel) or the R44Q (right panel) MBD domain in HEK293 cells. Scale bar 10  $\mu$ m. This figure refers to Fig. 3.

**a****Co-transfection : TALE-Venus & TALE-mRuby2**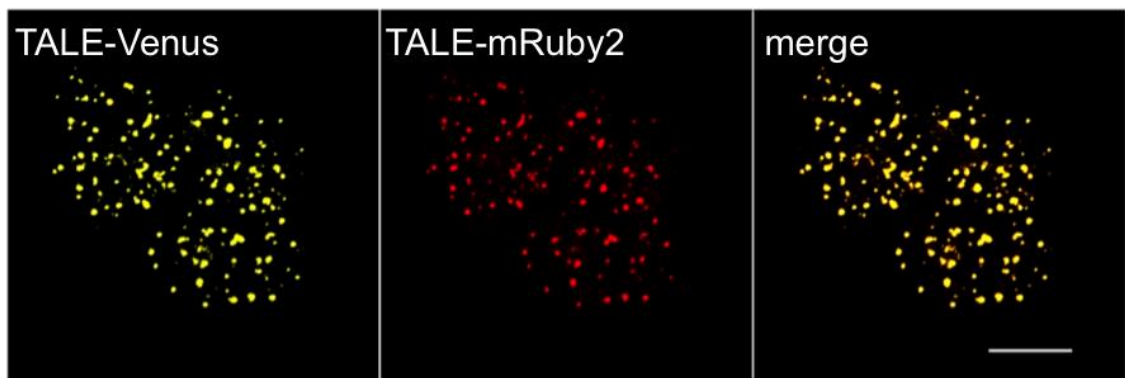**Co-transfection : TALE-Venus & TALE-VenN**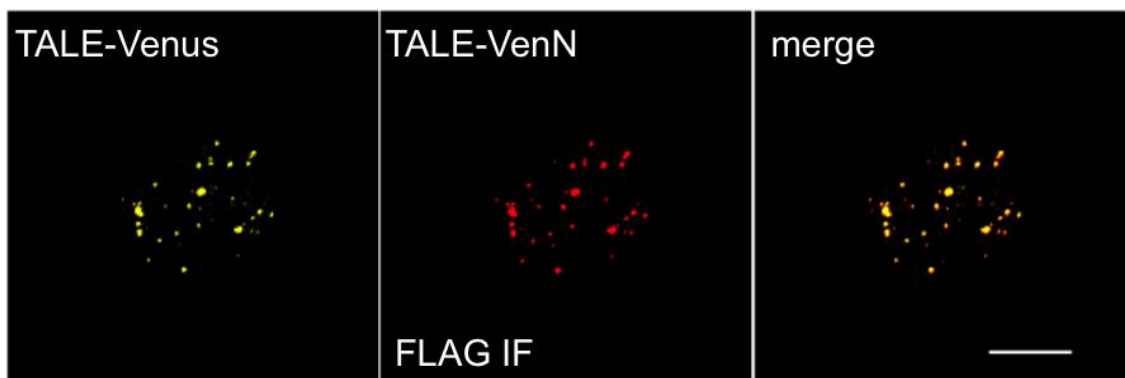**b****Single transfection : TALE-VenN**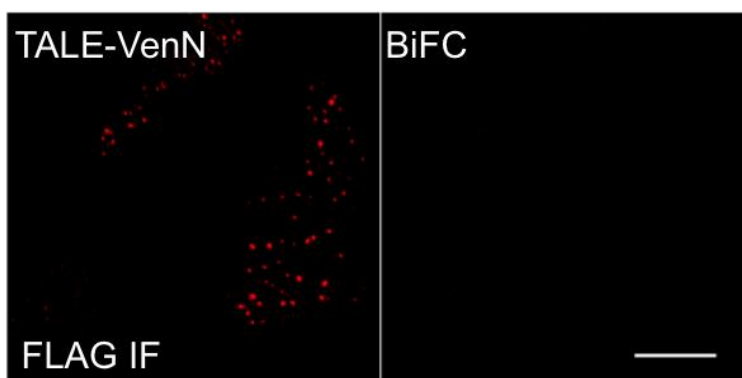

**Supplementary Figure 11: Quality control of the TALE DNA-binding domain used in BiAD sensor 2.** (a) Fluorescence microscopy image documenting the co-localization of the TALE-mRuby2 construct generated in this study with the TALE-Venus described and validated previously by Ma et al., 2013. Fusing of the DNA binding domain with mRuby2 instead of Venus does not lead to an alteration in the localization of the construct indicating that the construct validation performed by Ma et al., 2013 can be extrapolated to the mRuby2 fusion. (b) Representative anti-FLAG

immunofluorescence image showing that the TALE-VenN fusion maintains its DNA sequence specificity as indicated by the co-localization of this construct with TALE-Venus. (c) Fluorescence microscopy image documenting the absence of a BiFC signal in cells transfected only with TALE-VenN. The expression of the construct was detected by anti-FLAG immunofluorescence. Scale bar 10  $\mu\text{m}$  for all images. This figure refers to Fig. 3.

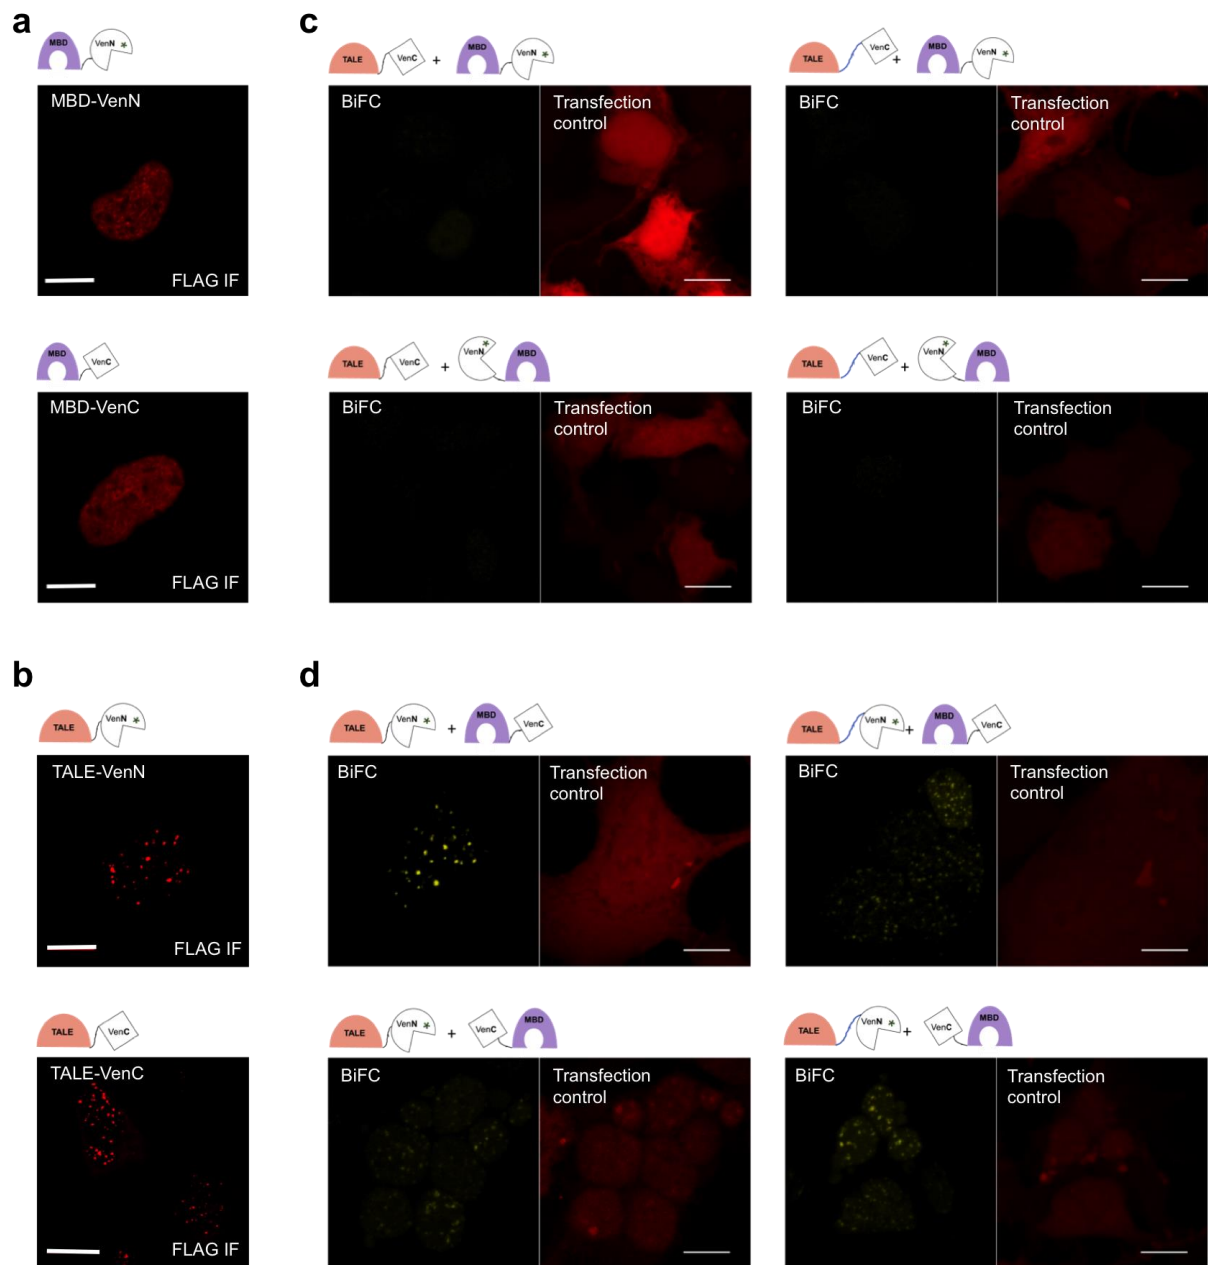

**Supplementary Figure 12: Optimization of the BiFC output of the BiAD sensor 2 through fluorophore repositioning.** (a) Immunofluorescence images documenting that fusion with VenN or VenC does not lead to the aggregation of the MBD construct (top vs. bottom panel). (b) VenN and VenC fusions of the TALE module (top vs. bottom panel) displayed a spotty localization in immunofluorescence images. This was comparable to what was observed for the TALE-Venus fusion. (c) Fluorescence microscopy images showing representative outcomes of the VenN fluorophore rearrangement around the MBD detector aiming to increase the sensitivity of the BiAD sensor 2. The VenC domain was fused to the TALE anchor, and separated either through a 7 amino acid (shown in black) or an 18 amino acid long linker (shown in blue). The lack of BiFC signal could not be attributed to miss-folding or delocalization of the VenN-MBD fusions, as immunofluorescence images showed a granular nuclear localization of all split-fluorophore fusions similar as with the full fluorophore-fused domain (Supplementary Figs. 12a and 10) (d) Fluorescence

microscopy images showing representative outcomes of the VenC fluorophore rearrangement on the MBD detector aiming to increase the sensitivity of the BiAD sensor 2. The VenN part was fused to the TALE anchor, and separated through either a 7 (shown in black) or 18 amino acid long linker (shown in blue). The tested combinations are schematically shown on top of the corresponding image. The transfection, imaging and display setting of this image are identical between cells shown in panels c-d and a-b, respectively. All cells were fixed at 48 h after transfection. Scale bar is 10  $\mu\text{m}$ . The figure refers to Fig. 3a.

**a****Co-transfection : TALE-Venus & MBD-Cerulean**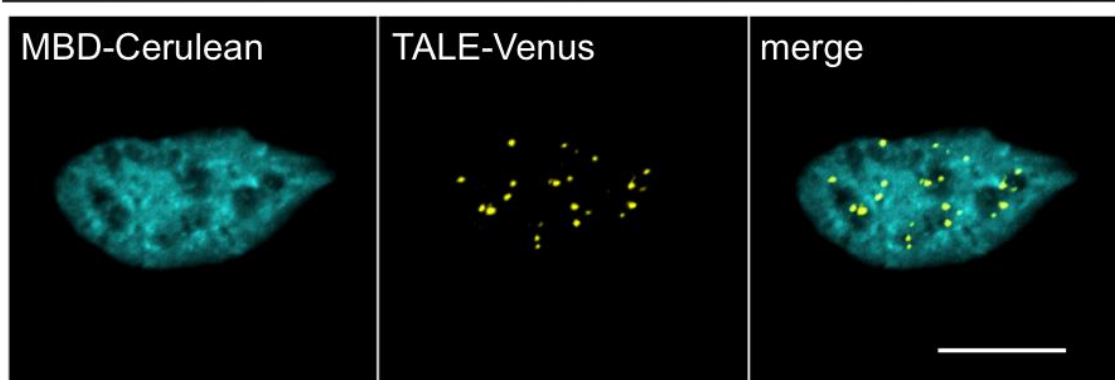**b****Co-transfection : TALE-VenN & MBD-VenC**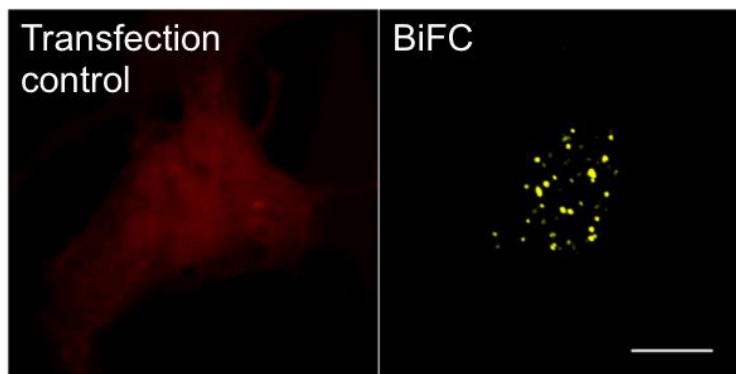

**Supplementary Figure 13: Comparison between the BiAD approach and co-localization microscopy for 5mC detection at human centromeric sites.** (a) Representative fluorescence microscopy image showing the localization of the full fluorophore tagged MBD and TALE modules in HEK293 cells. The merge image documents the overlap between the fluorescence of the TALE and MBD signals. (b) Representative fluorescence microscopy image documenting the localization of the BiFC signal in human cells. Comparison between the merged image in panel a and the pattern observed for the BiAD signal, highlights the advantage of the BiAD technology over co-localization microscopy. Scale bar for all images is 10  $\mu\text{m}$ . This figure refers to Fig. 3.



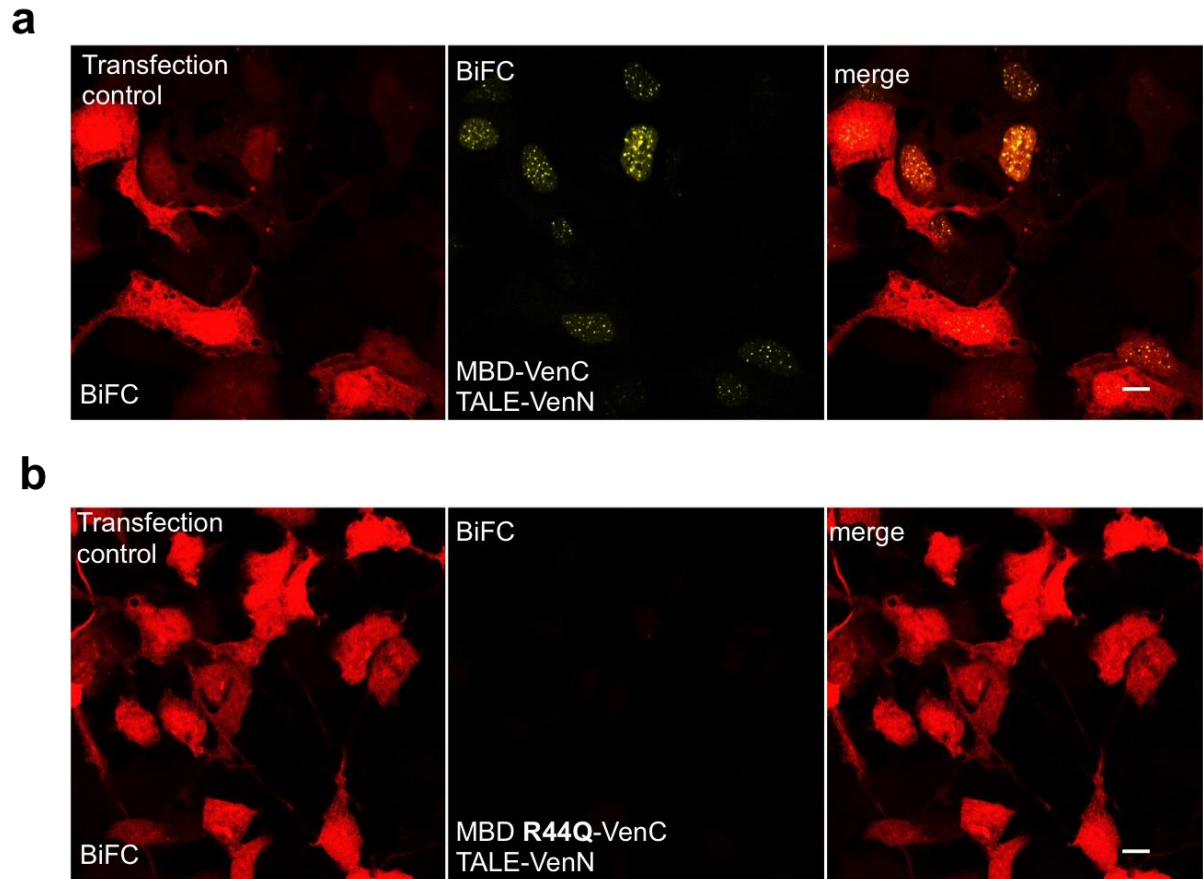

**Supplementary Figure 14: Validation of the 5mC specificity of the BiAD sensor 2.** (a) Zoom out fluorescence microscopy images documenting that the BiAD sensor 2 leads to a strong BiFC signal only when an intact MBD domain is used. (b) Replacing this with the R44Q variant, dramatically reduced the BiFC yield. The transfection, imaging and display setting of this image are identical between the cells shown in panels a and b. Images were taken 48 h after transfection. Scale bar is 10  $\mu$ m. This figure refers to Fig. 2.

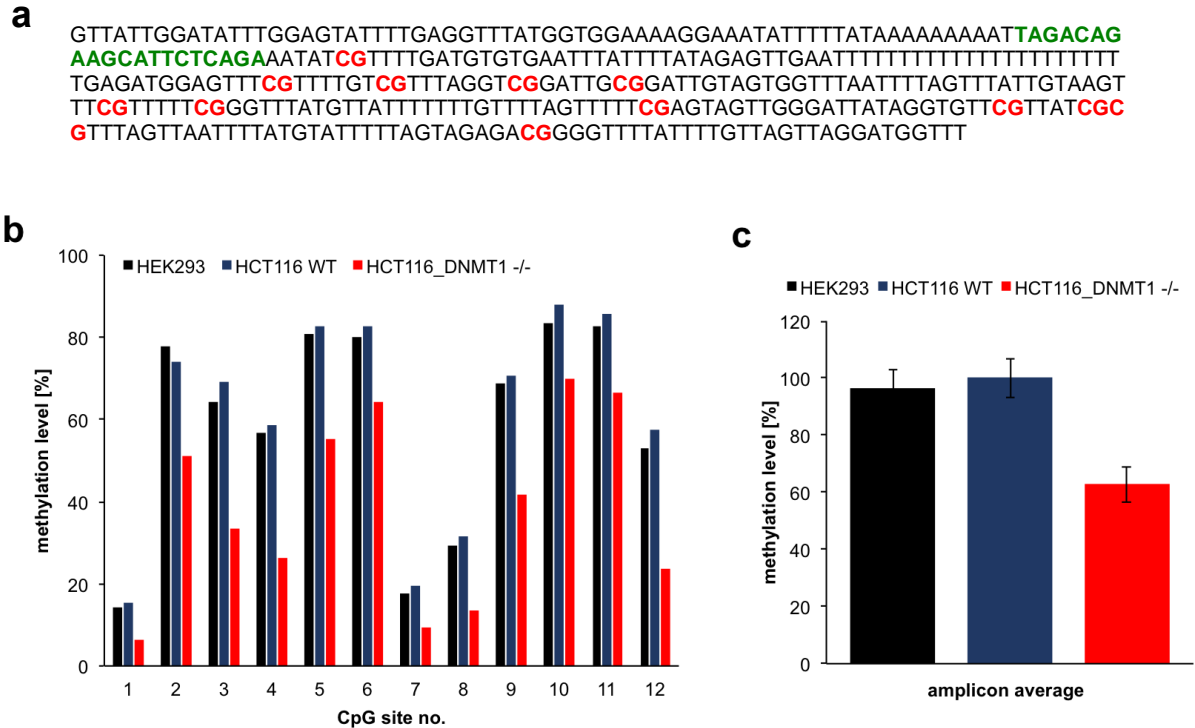

**Supplementary Figure 15: TALE binding sites (TBS) show reduced DNA methylation in HCT116 cells that express a hypomorphic DNMT1 variant.** (a) The sequence of the 358bp amplicon used for NGS. The TBS is highlighted in green, while each of the 12 CG sites is annotated in red. (b) Average DNA methylation at each of the 12 CG sites within the amplicon shown in panel a. All sites show a clear reduction in DNA methylation levels in the DNMT1 hypomorphic cell line. (c) Average DNA methylation over all CG sites shown in panel b. In line with the data shown in panel b, a strong reduction in DNA methylation was detectable at all 12 CG sites within the sequenced amplicon. Error bars represent s.e.m. of the methylation variation between the individual CG sites. This figure refers to Fig. 4.

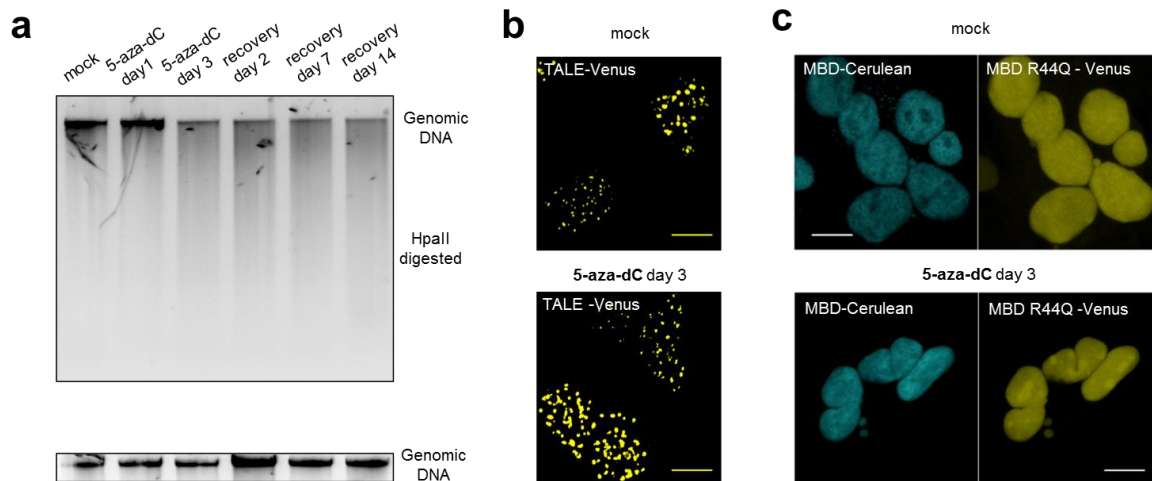

**Supplementary Figure 16: Assessment of the efficiency of the 5-aza-dC treatment and the effect of the drug on the cellular localization of the domains used for BiAD sensor 2.** (a) Agarose gel documenting the efficiency of the 5-aza-dC treatment. Genomic DNA was collected at the annotated time points and digested with the methylation sensitive restriction enzyme HpaII. Equal amounts of undigested DNA were used as loading control. Dramatic global demethylation was observed after 3 days of treatment and reduced methylation could still be detected 14 days after drug removal. (b) Representative fluorescence microscopy images documenting that the localization of the TALE anchor in HEK293 cells is not affected by the 5-aza-dC treatment. (c) Fluorescence microscopy images showing the localization of the MBD 5mC-detecting module in mock (top panel) and 5-aza-dC-treated (bottom panel) cells. Scale bar for all images is 10  $\mu$ m. The figure refers to Fig. 4.

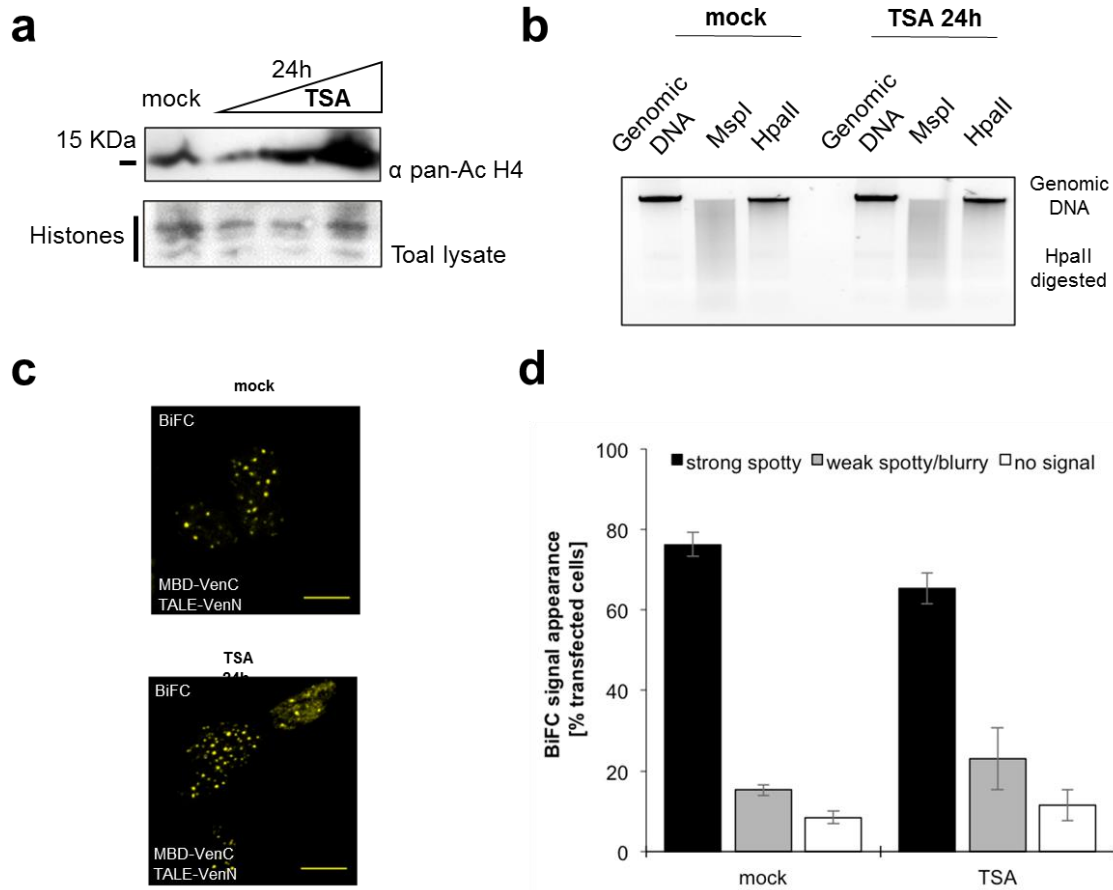

**Supplementary Figure 17: Quality control of the TSA treatment and evaluation of its effect on the fluorescent signal produced by BiAD sensor 2.** (a) Western blot validation of the increase in H4Ac in total cell lysates isolated from HEK293 cells after treatment with increasing amounts of TSA. TSA is a potent inhibitor of histone deacetylases and was shown to cause dramatic genome-wide chromatin decondensation<sup>3</sup>. The highest TSA concentration was selected for further experiments. (b) Agarose gel of genomic DNA isolated from mock and TSA-treated cells. HpaII DNA methylation-sensitive digest patterns do not show global differences in DNA methylation levels between the two samples. Corresponding amounts of undigested and MspI-digested DNA were used as loading controls. (c) Fluorescence microscopy images demonstrating that the BiAD sensor 2 is not affected by TSA-induced alteration of the local chromatin compaction state in cells. Scale bar for all images is 10  $\mu$ m. The transfection, imaging and display setting of the BiFC images displayed are identical. (d) Quantification of the number of cells with BiFC signal in the experiments shown in panel c. Error bars in all images represent the s.e.m. for two biological replicates (for details cf. Supplementary Tables 2, 6 and 7). The figure refers to Fig. 4.

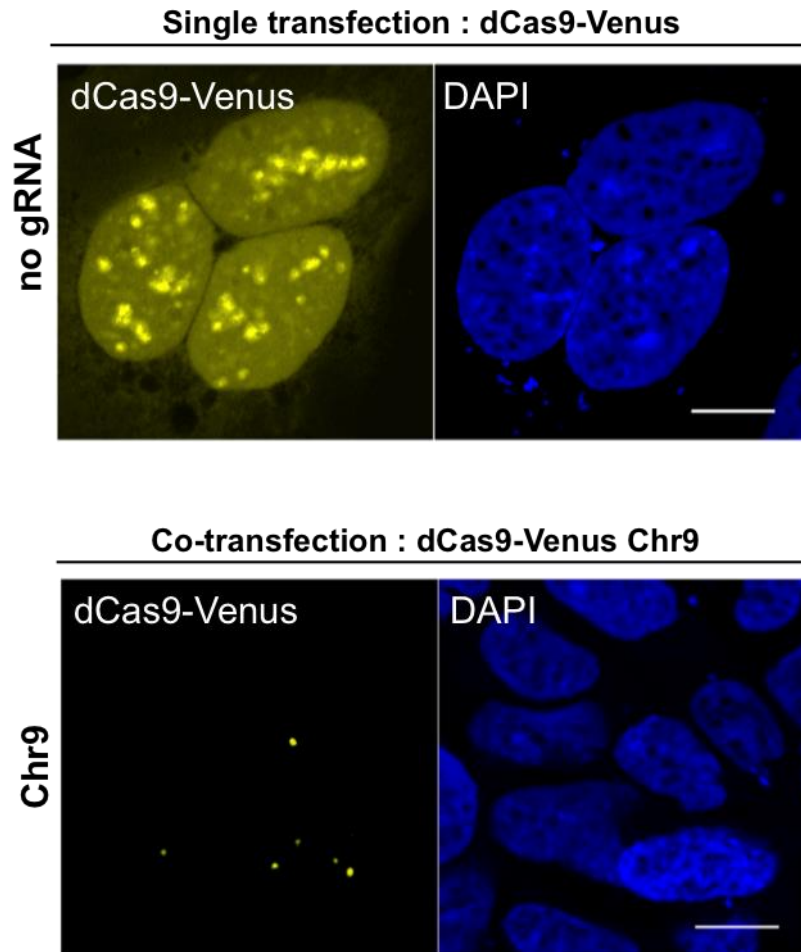

**Supplementary Figure 18: Quality control of the DNA-binding anchor modules used in BiAD sensor 3.** Fluorescence localization images documenting the DNA sequence specificity and guide RNA-dependence of the dCas9-Venus fusion. A clear spotty localization of dCas9-Venus was only observed after co-transfection with a guide RNA targeting a repetitive DNA sequence unique to chromosome 9 (top vs bottom panel). Scale bar for all images is 10  $\mu$ m. This figure refers to Fig. 5.

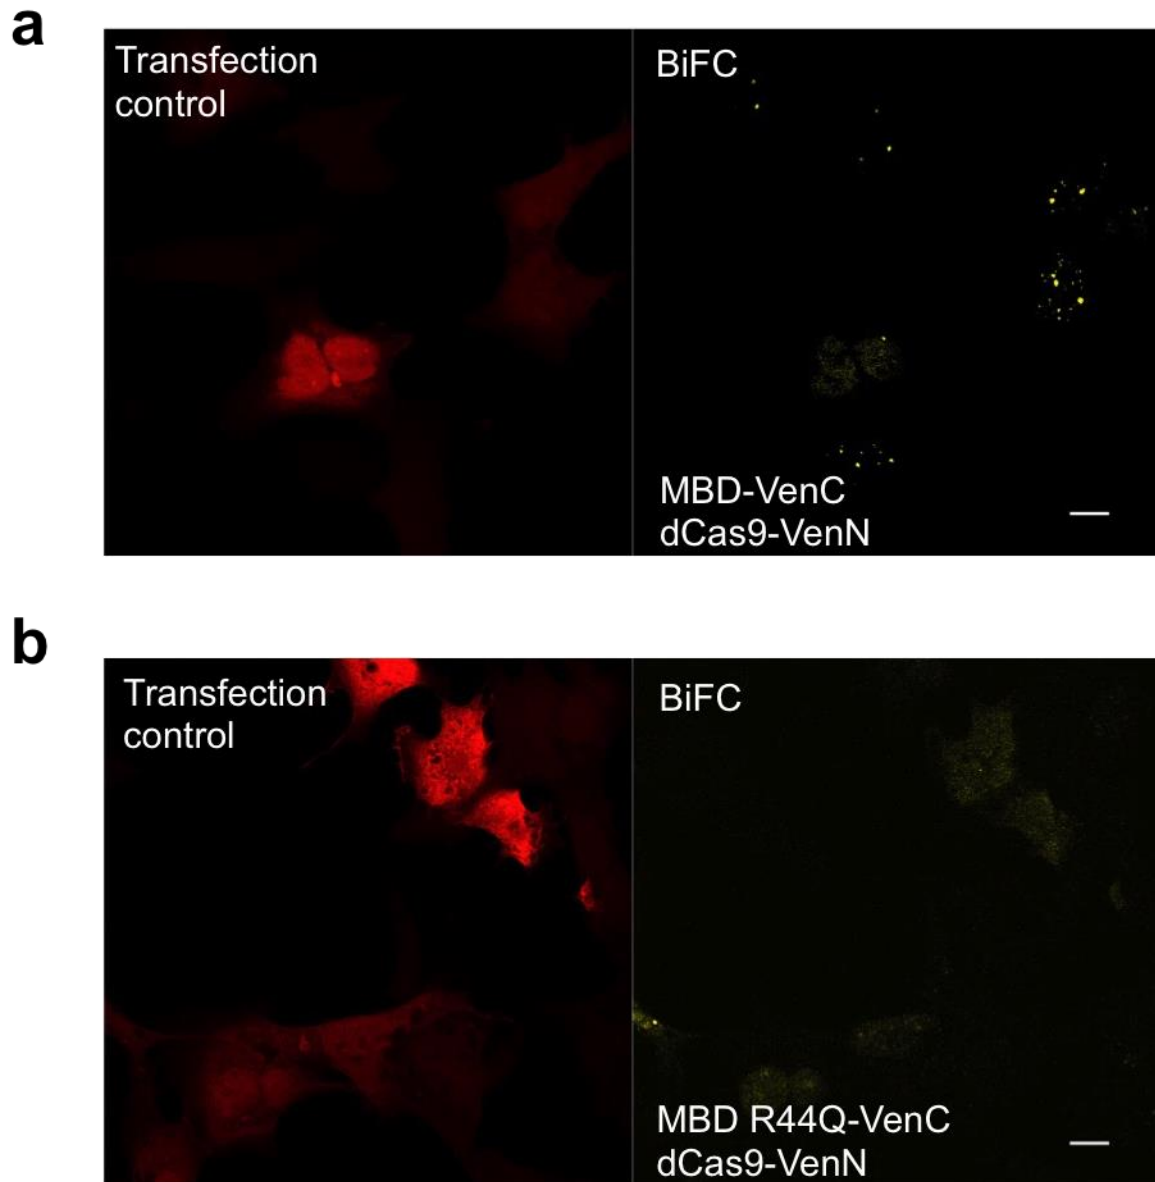

**Supplementary Figure 19: Validation of the 5mC specificity of the BiAD sensors 3.** (a) Zoom out fluorescence microscopy images documenting that the BiAD sensor 2 leads to a strong BiFC signal only when an intact MBD domain is used. (b) Replacing this with the R44Q variant, dramatically reduced the BiFC yield. The transfection, imaging and display setting of this image are identical between the cells shown in panel a and b. Scale bar for all images is 10  $\mu$ m. This figure refers to Fig. 5.

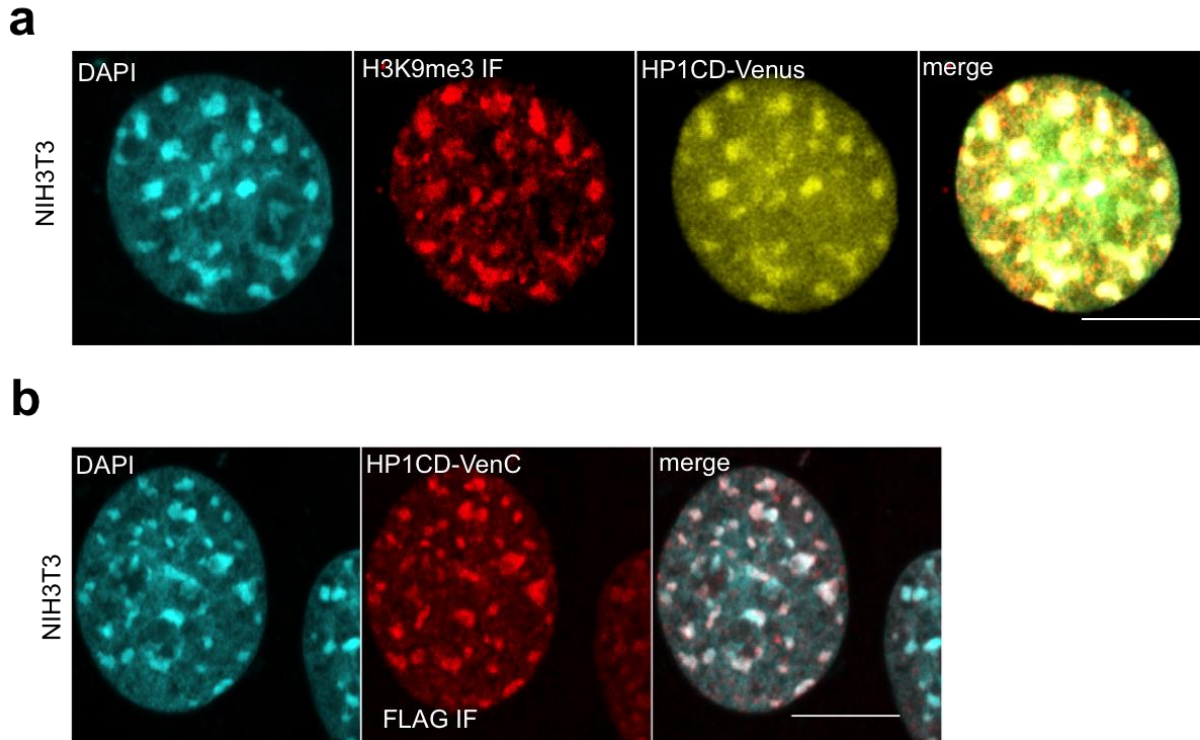

**Supplementary Figure 20: Quality control of the H3K9me3 detector module used in this study.** (a) Fluorescence microscopy image documenting the H3K9me3 specificity of the HP1CD-Venus domain, as indicated by the overlap of the domain with the antibody staining signal. (b) The HP1CD-VenC detector domain specifically localizes to mouse DAPI chromocenters in mouse fibroblasts. Scale bar for all images is 10  $\mu\text{m}$ . This figure refers to Fig. 6.

**a**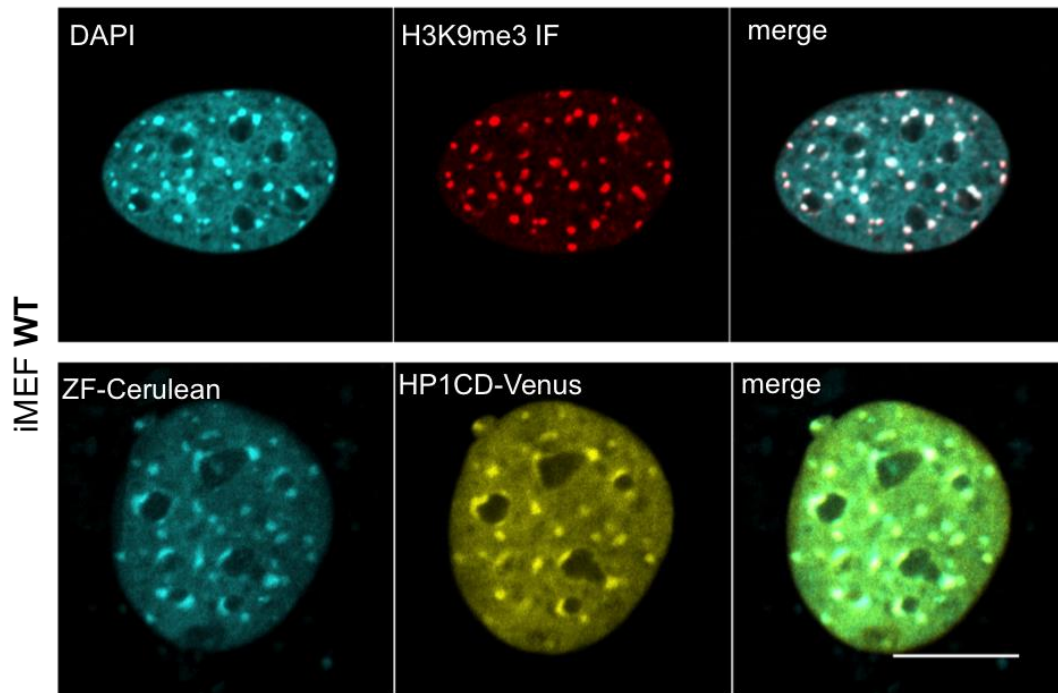**b**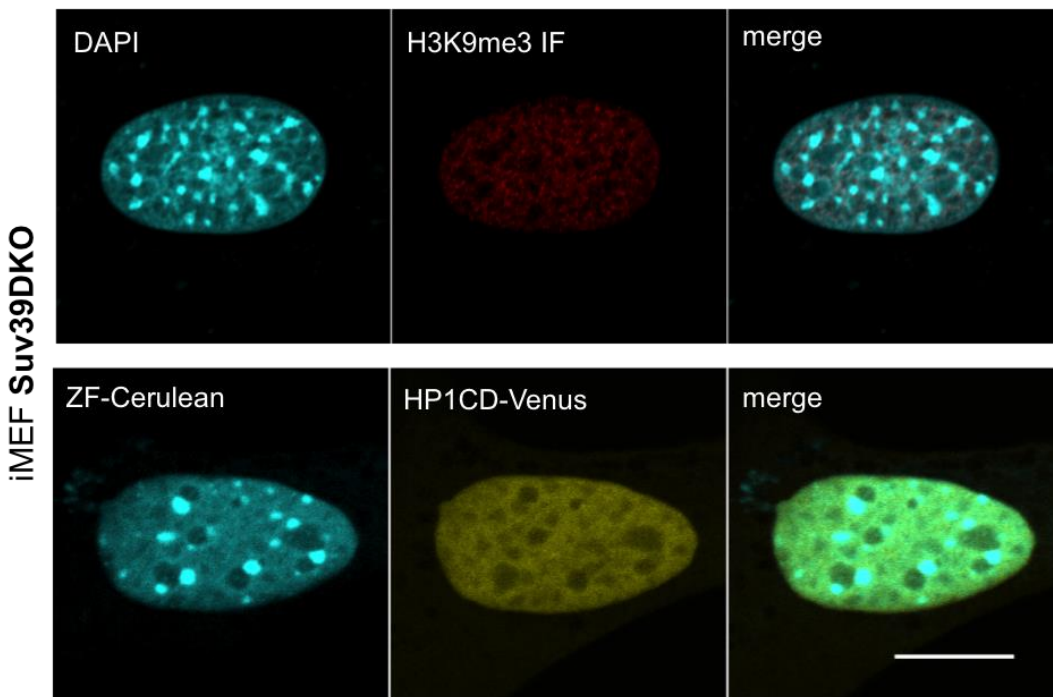

**Supplementary Figure 21: Quality control of the H3K9me3 detector module used in BiAD sensor 4.** Fluorescence microscopy images demonstrating that the ZF and the HP1CD modules (bottom panel) co-localize with the DAPI and H3K9me3 staining (top panel) respectively, observed in WT (**a**) and Suv39DKO (**b**) cells. This highlights the high DNA sequence and mark specificity of the two domains. This figure refers to Fig. 6.



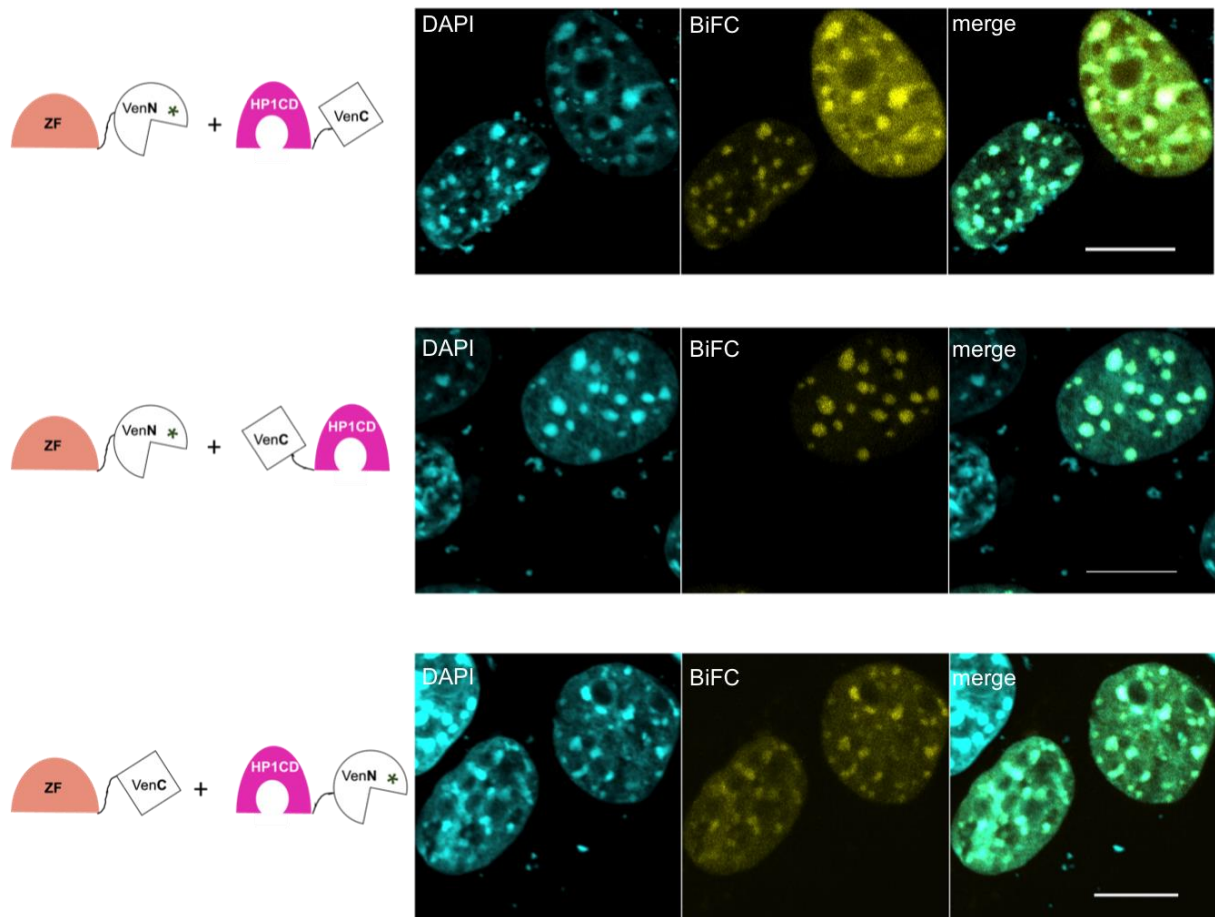

**Supplementary Figure 22: Optimization of the BiFC yield of the BiAD sensor 4 by fluorophore permutations.** Fluorescence microscopy images showing representative outcomes of the fluorophore rearrangement strategy employed to increase the sensitivity of the BiAD sensor 4. The tested combinations are schematically shown on the left of the corresponding image. Scale bar for all images is 10  $\mu\text{m}$ . The cells were fixed 48h after transfection and the imaging and display setting of the images are identical between the 3 panels of the figure. The figure refers to Fig. 6.

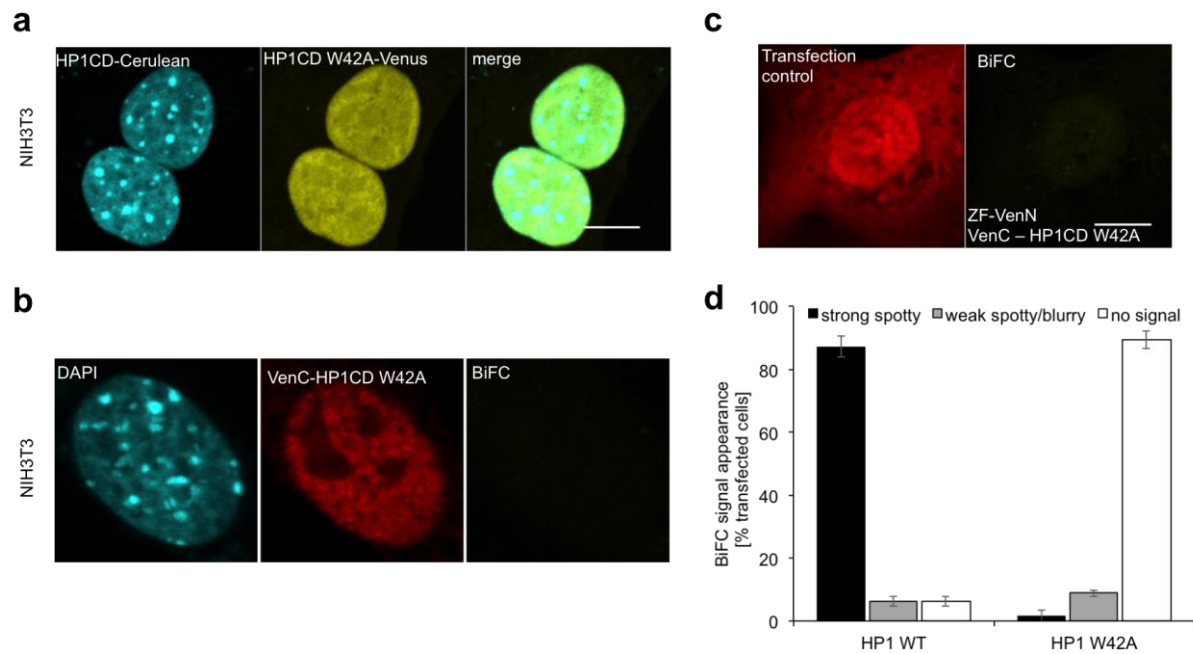

**Supplementary Figure 23: Application of the HP1CD W42A variant to validate the H3K9me3 specificity of the BiAD sensor 4.** W42A contains a mutations in the H3K9me3 trimethyllysine binding pocket that eliminates methyllysine binding (Nielsen et al., 2002). (a) Fluorescence microscopy images showing that sub-nuclear localization pattern of the HP1CD W42A domain mutant differs from the WT in NIH3T3. (b) Anti-FLAG immunofluorescence images demonstrating that like the full-fluorophore fusion, the VenC-fused HP1CD W42A no longer localizes to mouse chromocenters. (c) Representative fluorescence microscopy image documenting that high H3K9me3 specificity of the BiAD sensor 4. Upon implementation of the HP1CD W42A variant as a detector module, no BiFC signal was detectable. Cells were fixed 48h after transfection. A separate plasmid encoding for NLS-mRuby2 was used to identify transfected cells. Scale bar for all images is 10  $\mu$ m. (d) Quantification of the number of cells with BiFC signal in the experiments representatively shown in panel c. Error bars represent s.e.m. for two biological replicates (for details cf. Supplementary Tables 4 and 6 and 7). This figure refers to Fig. 6.

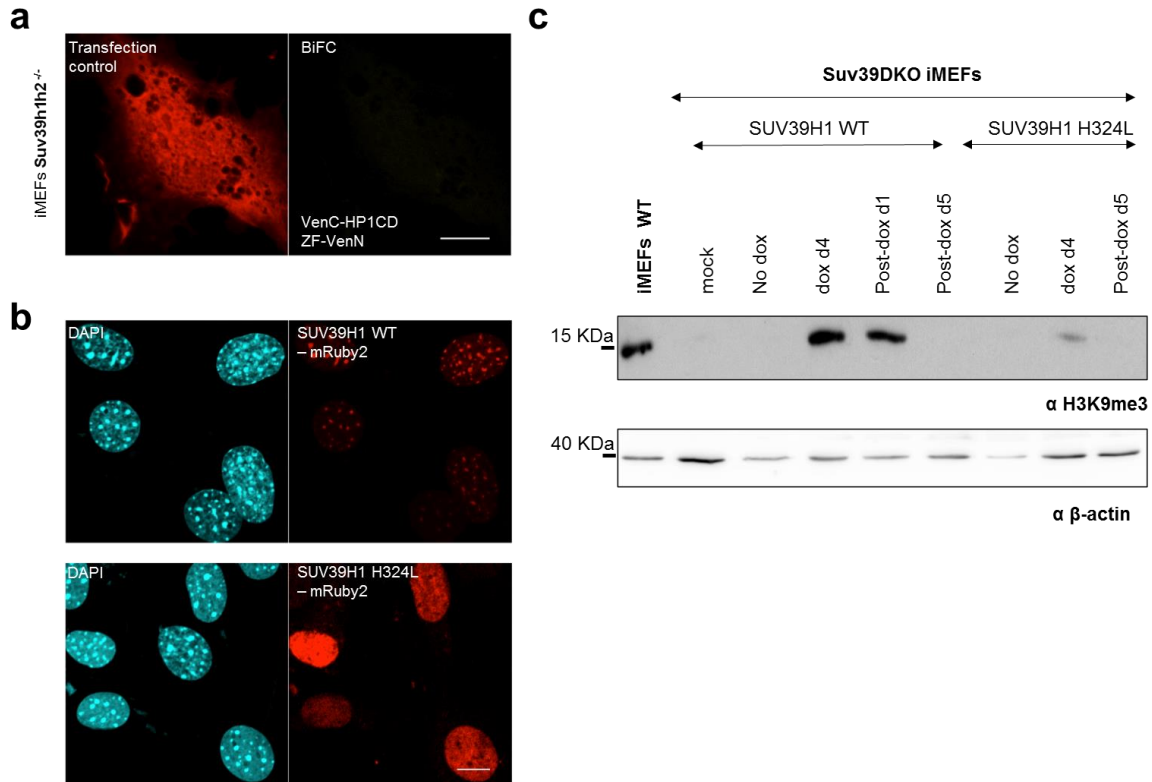

**Supplementary Figure 24: Establishment of a model cell line for studying H3K9me3 dynamics.** (a) Loss of BiFC signal formation in Suv39DKO cells with reduced H3K9me3 mark at pericentromeric repeats. (b) Fluorescence microscopy images documenting the successful and comparable protein expression of the WT SUV39H1 and inactive H324L SUV39H1 both fused to mRuby2 4 days post dox induction. The imaging and display setting of the images are identical between the 2 panels of the figure. (c) Western blot validation of the H3K9me3 recovery upon expression of the WT SUV39H1. The cell lysates were collected from original Suv39DKO cells (mock), before dox treatment (no dox), 4 days after the onset of dox treatment (dox d4), as well as 1 and 5 days after dox removal (post-dox d1 and d5). The catalytic activity of SUV39H1 was essential for H3K9me3 recovery. Equal volumes of lysates as what was used in the top blot were loaded on a separate SDS-PAGE and subjected to  $\beta$ -actin detection, as loading control. Scale bar for all images is 10  $\mu$ m. The figure refers to Fig. 6.

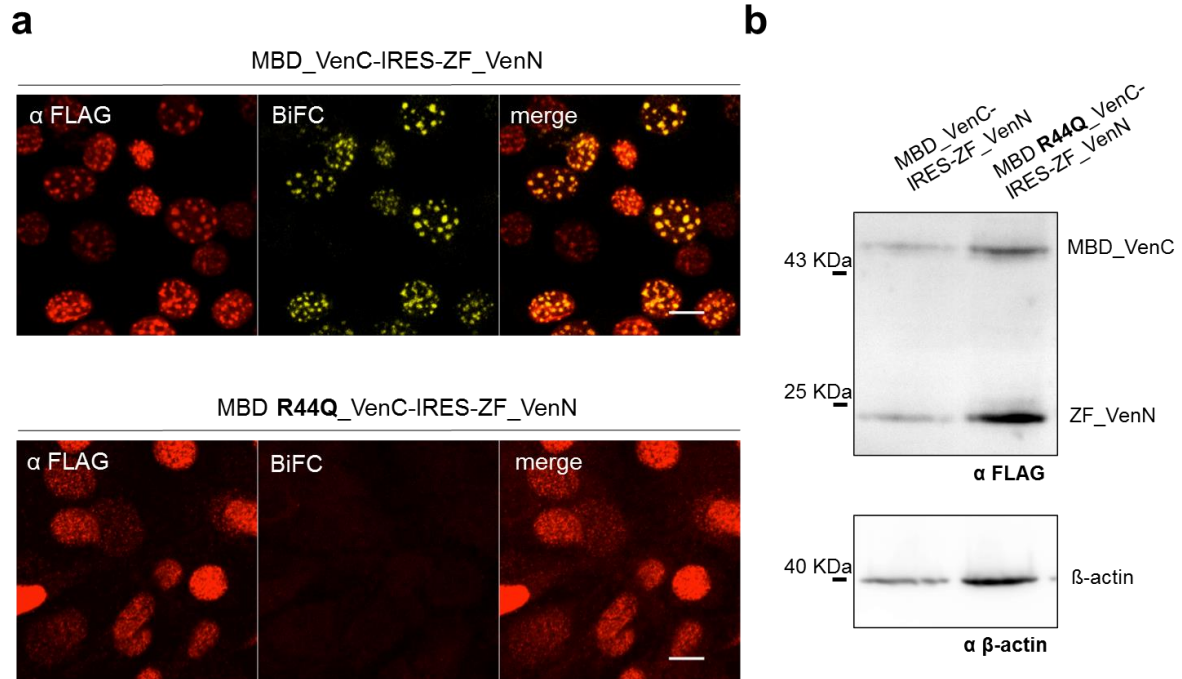

**Supplementary Figure 25: Generation of cell lines stably expressing the BiAD 1 sensor.** (a) Fluorescence microscopy images demonstrating that a BiFC signals are only detectable in the cell line expressing an intact MBD detector module (top panel) but not where the MBD R44Q was used (bottom panel). This shows that the 5mC specificity of the biosensor is preserved when its modules are constitutively expressed. Anti-FLAG immunofluorescence was used to detect the expression of the BiAD modules. Scale bar for all images is 10  $\mu$ m. The imaging and display setting of the images are identical between the 2 panels of the figure. (b) Western blot validation of the expression of the FLAG-tagged anchor and detector modules in the cell lines shown in a.  $\beta$ -actin was used as a loading control. This figure refers to Fig. 7.

## Supplementary figure 26. Sequences of the plasmids used in this study.

### MBD-VenC

Annotated features:

3\*FLAG

MBD of MBD1

Endogenous NLS

Linker

VenC

Full plasmid sequence:

```
GACGGATCGGGAGATCTCCGATCCCCTATGGTGCAGTCTCAGTACAATCTGCTCTGATGCCGCATAGTTAAGCCAGTATC
TGCTCCCTGCTTGTGTGTTGGAGGTCGCTGAGTAGTGCAGCAGCAAAATTAAGCTACAACAAGGCAAGGCTTGACCGACA
ATTGCATGAAGAATCTGCTTAGGGTTAGGCGTTTTGCGCTGCTTCGCGATGTACGGGCCAGATATACCGGTTGACATTGAT
TATTGACTAGTTATTAATAGTAATCAATTACGGGGTCATTAGTTCATAGCCATATATGGAGTTCGCGTTACATAACTTACG
GTAATGGCCCGCCTGGCTGACCGCCCAACGACCCCGCCATTGACGTCAATAATGACGTATGTTCCCATAGTAACGCC
AATAGGGACTTTCCATTGACGTCAATGGGTGGACTATTTACGGTAACTGCCCACTTGGCAGTACATCAAGTGTATCATATG
CCAAGTACGCCCCCTATTGACGTCAATGACGGTAAATGGCCCGCCTGGCATTATGCCAGTACATGACCTTATGGGACTTT
CCTACTTGGCAGTACATCTACGTATTAGTTCATCGCTATTACCATGGTGTATGCGGTTTTGGCAGTACATCAATGGGCGTGGAT
AGCGGTTTTGACTCACGGGGATTTCCAAGTCTCACCCCAATTGACGTCAATGGGAGTTTTTTTTGGCACCAAAATCAACGGG
ACTTTCCAAAATGTCGTAACAACCTCCGCCCAATTGACGCAAATGGGCGGTAGGCGGTGACGGTGGGAGGTCTATATAAGCA
GAGCTCTCTGGCTAACTAGAGAACCCACTGCTTACTGGCTTATCGAAATTAATACGACTCACTATAGGGAGACCCAAGCTTC
TCGGGCCAAATAATcATTTTTATTTGACTGATAGTGACCTGTTCTGTTGCAACAAATTTGATGAGCAATGCTTTTTATAATGGAC
TATAAGGACCACGACGGAGACTACAAGGATCATGATATTGATTACAAGACGATGACGATAAGATGGCTGAGGACTGGCTG
GACTGCCCGCCCTGGGCCCTGGCTGGAAGCGCCCGAAGTCTTTCGAAAGTCAGGGGCCACCTGTGGACGCTCAGACA
CCTATTACCAGAGCCCCACAGGAGACAGGATCCGAAGCAAAGTTGAGCTGACTCGATACCTGGGCCCTGCGTGTGATCTC
ACCCTCTTCGACTTCAAACAAGGCATCTTGTGCTATCCAGCCCCAAGGCCCATCCCGTGGCGGTTGCCAGCAAGAAGCG
AAAGAAGCCTTCAAGGCCAGCCAAGACTCGGAAACGTGAGTTGGACCCAGAGTGGTGAGGTCAGGAAGGAGGCCCG
ATCGATGGTGGCGGTGGCTCTGGAGGTGGTGGTCTCCGGAAGCCCCAACGAGAAGCGCGATCACATGGTCTCTGCTGG
AGTTCGTGACCGCCCGCGGGATCACTCTCGGCATGGACGAGCTGTACAAGTAATAATCTAGAGGGCCCTATTCTATAGTGT
CACCTAAATGCTAGAGTCTGATCAGCCTCGACTGTCCCTTAGTTGCCAGCCATCTGTTGTTGGCCCTCCCCGTTG
CCTTCCTTGACCCTGGAAGGTGCCACTCCCCTGCTCTTCTTAATAAAAATGAGGAAATTCATCGCATTGTCTGAGTAGGT
GTCATTCTATTCTGGGGGTGGGGTGGGGCAGGACAGCAAGGGGGAGGATTGGGAAGACAATAGCAGGCATGCTGGGGA
TGCGGTGGGCTCTATGGCTTCTGAGGCGGAAAGAACCAGCTGGGGCTCTAGGGGGTATCCCCACGCGCCCTGTAGCGGC
GCATTAAGCGCGGGCGGGTGTGGTGGTTACGCGCAGCGTGACCGCTACACTTGGCAGCGCCCTAGCGCCCCGCTCCTTTG
CTTTCTTCCCTTCTTCTCGCCACGTTCCGCGGCTTTCCCGTCAAGCTCTAAATCGGGGCATCCCTTTAGGGTCCGATT
TAGTCTTTACGGCACCTCGACCCCAAAAACCTTGAATAGGCTGATGGTTCACGTAGTGGGCCATCGCCCTGATAGACGGT
TTTTCGCCCTTTGACGTTGGAGTCCACGTTCTTAAATAGTGGACTCTTGTTCAAAACCTGGAACAACACTCAACCCTATCTCG
GTCTATTCTTTGATTTATAAGGGATTTTGGGGATTTCCGCTATTGGTAAAAAATGAGCTGATTTAACAAAAATTAACGC
GAATTAATTCTGTGGAATGTGTGTCAGTTAGGGTGTGAAAGTCCCCAGGCTCCCCAGGCAGGCAGAAGTATGCAAAAGCAT
GCATCTCAATAGTACGCAACCAGGTGTGAAAGTCCCCAGGCTCCCCAGCAGGCAGAAGTATGCAAAAGCATGCATCTCAA
TTAGTCAGAAACCATAGTCCCAGCCCTAATCCGCCCTCCCGCCCTAATCCGCCCACTCCGCCCACTCCGCCCACTCCGCCCA
TGGCTGACTAATTTTTTTATTTATGACAGAGGCCAGGCCGCTCTGCCTCTGAGCTATTCCAGAAGTAGTAGGAGGCTTT
TTTGGAGGCTTAGGCTTTTGCAAAAAGCTCCCGGGAGCTTGTATATCCATTTTTCGGATCTGATCAAGAGACAGGATGAGGA
TCGTTTCGCATGATTGAACAAGATGGATTGCACGCAGGTTCTCCGGCCGCTTGGGTGGAGAGGCTATTCCGGCTATGACTG
GGCACAACAGACAATCGGCTGCTCTGATGCCGCCGTGTTCCGGCTGTACGCGCAGGGGCGCCCGTCTTTTTGTCAAGA
CCGACCTGTCCGGTGCCCTGAATGAACTGCAGGACGAGGCAGCGCGGCTATCGTGGCTGGCCACGACGGGCGTTCTTTG
CGCAGCTGTGCTGCAGTGTCTACTGAAGCGGGAAAGGACTGGCTGCTATTGGGCGAAGTCCCGGGGAGGATCTCCTG
TCATCTCACCTTGCCTTCCGAGAAAAGTATCCATCAGGCTGATGCAATGCGGCGGCTGCATACGCTTGTATCCGGCTACC
TGCCCATTCGACCACCAAGCGAAACATCGCATCGAGCGAGCACGTAAGGATGGAAGCCGGTCTTGTGATCAGGATGA
TCTGGACGAAGAGCATCAGGGGCTCGCGCCAGCCGAAGTTCGCCAGGCTCAAGGCGCGCATGCCCGACGGCGAGGAT
CTCGTGTGACCCATGGCGATGCCTGCTTGCAGAAATCATGTTGGAAAATGGCCGCTTTTCTGGATTATCGACTGTGGC
CGGTGGGTGTGGCGGACCCGATCAGGACATAGCCTTGGCTACCCGCTGATTTGCTGAAGAGCTTGGCGGCGAATGGG
GCTACCCGTTCTCTGCTTACGGTATCGGTATCGGCTCCCGATTGCGAGCAGCATCGCCTTCTATCGCTTCTTACAGATTCT
TCTGAGCGGGACTCTGGGGTTCGAAATGACCGACCAAGCAGCGCCCAACCTGCCATCACGAGATTTTCGATTCCACCGCCG
CCTTCTATGAAAGGTTGGGCTTCGGAATCGTTTTCCGGGACGCCGGCTGGATGATCCTCCAGCGCGGGGATCTCATGCTG
GAGTTCTTCGCCACCCCAACTTGTATTGACAGTATAATGGTTACAATAAAGCAATAGCATCACAAATTTACAAATAA
AGCATTTTTTCACTGCATTCTAGTTGTGGTTTTGTCAAAACCTCATCAATGTATCTTATCATGTCTGTATACCGTTCGACCTTAG
CTAGAGCTTGGCGTAATCATGGTATAGTCTGTTCTGTGTGAAATGTTATCCGCTCACAATTCACACACATACGAGCC
GGAAGCATAAAGGTAAAGCTGAAAGCTGGGGTGCCTAATGAGTAACTCAATACATTAATGCGTTGCGCTGACTGCCGCTTC
CAGTCGGGAAACCTGTGCTGCCAGCTGCATTAATGAATCGGCCAACGCGGGGAGAGGCGGTTTTGCGTATTGGGCGCT
CTTCCGTTCTCTGCTCACTGACTCGCTGCGCTCGGTCGTTCCGCTGCGGCGAGCGGTATCAGCTCACTCAAAGGCGGTA
ATACGGTTATCCACAGAATCAGGGGATAACGCAGGAAAGAACATGTGAGCAAAAGGCCAGCAAAAGGCCAGGAACCGTAA
```

AAAGGCCGCGTTGCTGGCGTTTTTCCATAGGCTCCGCCCCCTGACGAGCATCACAAAAATCGACGCTCAAGTCAGAGGT  
GGCGAAACCCGACAGGACTATAAAGATACCAGGCGTTTTCCCCCTGGAAGCTCCCTCGTGCCTCTCCTGTTCCGACCCTG  
CCGCTTACCGGATACCTGTCCGCTTTCTCCCTCGGGAAGCGTGGCGCTTCTCAATGCTCAGCTGTAGGTATCTCAGT  
TCGGTGTAGGTCGTTCCGCTCCAAGCTGGGCTGTGTGCACGAACCCCGTTTCAGCCCGACCGCTGCGCTTATCCGGTAA  
CTATCGTCTTGAGTCCAACCCGGTAAGACACGACTTATCGCCACTGGCAGCAGCCACTGGTAACAGGATTAGCAGAGCGA  
GGTATGTAGGCGGTGCTACAGAGTCTTGAAGTGGTGGCCTAACTACGGCTACACTAGAAGGACAGTATTTGGTATCTGCG  
CTCTGCTGAAGCCAGTTACCTTCGGAAAAAGAGTTGTAGCTCTTGATCCGGCAAACAAACCACCGCTGGTAGCGGTGGTT  
TTTTGTTTGAAGCAGCAGATTACGCGCAGAAAAAAGGATCTCAAGAAGATCCTTTGATCTTTTCTACGGGGTCTGACGC  
TCAGTGAACGAAAACTCACGTTAAGGGATTTTGGTTCATGAGATTATCAAAAAGGATCTTCACCTAGATCCTTTTAAATAAA  
AATGAAGTTTTAAATCAATCTAAAGTATATAGATAAAGTGGTCTGACAGTTACCAATGCTTAATCAGTGAGGCACCTATC  
TCAGCGATCTGTCTATTTGTTTCATCCATAGTTGCCTGACTCCCGTCTGTAGATAACTACGATACGGGAGGGCTTACCAT  
CTGGCCCCAGTGTGCAATGATACCGCGAGACCCACGCTCACCAGGCTCCAGATTTATCAGCAATAAACCAGCCAGCCGGA  
AGGGCCGAGCGCAGAAGTGGTCTGCAACTTATCCGCCTCCATCCAGTCTATTAATTGTTGCCGGGAAGCTAGAGTAAGT  
AGTTCGCCAGTTAATAGTTTGCACAACGTTGTTGCCATTGCTACAGGCATCGTGGTGTACGCTCGTCTGTTGGTATGGCT  
TCATTCAGCTCCGGTTCCCAACGATCAAGGCGAGTTACATGATCCCCCATGTTGTGCAAAAAAGCGTTCAGCTCCCTCGGT  
CCTCCGATCGTTGTCAGAAGTAAGTTGGCCGAGTGTATCACTCATGGTTATGGCAGCACTGCATAATTCTCTTACTGTCA  
TGCCATCCGTAAGATGCTTTTCTGTGACTGGTGTACTCAACCAAGTCAATTCTGAGAATAGTGTATGCGGCGACCGAGTT  
GCTCTTGCCCGCGTCAATACGGGATAATACCGCGCCACATAGCAGAACTTTAAAAGTGTCTCATTTGAAAAACGTTCTT  
CGGGGCGAAAACTCTCAAGGATCTTACCGCTGTTGAGATCCAGTTCGATGTAACCCACTCGTGCACCCAACTGATCTTACG  
CATCTTTACTTTACCAGCGTTTCTGGGTGAGCAAAAACAGGAAGGCAAAATGCCGCAAAAAAGGAATAAGGGGCGACAC  
GGAAATGTTGAATACTACACTCTTCTTTTCAATATTATTGAAGCATTTATCAGGTTATTGTCTCATGAGCGGATACATAT  
TTGAATGATTTAGAAAAATAAACAAATAGGGGTTCCGCGCACATTTCCCGAAAAAGTGCCACCTGACGTC

## VenC-HP1CD

Annotated features:

3\*FLAG

VenC

Linker

SV40 NLS

Chromodomain of HP1

Full plasmid sequence:

TAGTTATAATAGTAATCAATTACGGGGTCAATTAGTTCATAGCCCATATATGGAGTTCGCGGTTACATAAECTTACGGTAAATG  
GCCCGCTGGCTGACCGCCCAACGACCCCGCCATTGACGTCAATAATGACGTATGTTCCCATAGTAACGCCAATAGGG  
ACTTTCCATTGACTCAATGGGTGGAGTATTACGGTAACTTACGGTAACTTGGCAGTACATCAAGTGATCATATGCCAAGTA  
CGCCCCCTATTGACGTCAATGACGGTAAATGGCCCGCTGGCATTATGCCCAGTACATGACCTTATGGGACTTTTCTACTT  
GGCAGTACATCTACGTATTAGTTCATCGCTATTACCATGGTGTATGCGGTTTTGGCAGTACATCAATGGGCGTGGATAGCGGT  
TTGACTCACGGGGATTTCCAAGTCTCCACCCCATTTGACGTCAATGGGAGTTTTGTTTTGGCACAAAATCAACGGGACTTTCC  
AAAATGTGTAACAACCTCCGCCCATTTGACGCAAAATGGGCGTAGGGCTGTACGGTGGGAGGTCTATATAAGCAGAGCTG  
TTTAGTGAACCGTCAGATCCGCTACGGTACCGCTACCGCCACTGACCGGATGACCGGATGACCGGATGACCGGATGACCGG  
ATGATATTGATTACAAAGACGATGACGATAAGGACCCCAACGAGAAGCGCGATCACATGGTCTCTGGAGTTTCGTGACCC  
CCGCCGGGATCACCTCGGCATGGACGAGCTGTACAAGATCGATGGTGGCGGTGGCTCTGGAGGTGGTGGGTCCTCCGG  
ACCAAGAAGAAGCGTAAGGTAGAGGAAGAGGAATATGTGGTGGAAAAAGTTCTTGATCGGCGAGTTGTCAAGGGCAAG  
TGGAATATCTTCTAAAGTGAAGGGTTTTCTCAGATGAGGACAACACTTGGGAGCCAGAAGAGAATCTGGATTGCCCTGACC  
TTATTGCTGAGTTTCTACAGTCACAGAAAAACAGCACATGAGTAATCCGGACTCAGATCTCGAGCTCAAGCTTCGAATTCTGC  
AGTCGACGGTACCGCGGGCCCGGGATCCACCGGATCTAGATAACTGATCATAATCAGCCATACCACATTTGTAGAGGTTTT  
ACTTGCTTTAAAAAACCTCCACACCTCCCCCTGAACCTGAAACATAAAATGAATGCAATTGTTGTTAACTTGTATTG  
CAGCTTATAATGGTTACAAATAAAGCAATAGCATCACAAATTTACAAATAAAGCATTTTTTTCACTGCATTCTAGTTGTGGTT  
TGCCAAACTCATCAATGTATCTTAACGGTAAATGTAAGCGTAAATTTTTGTTAAAAATTCGCTTAAATTTTTGTTAAATC  
AGTCAATTTTTTAAACCAATAGGCCGAAATCGGCAAAATCCCTTATAAATCAAAAGAATAGACCGAGATAGGGTTGAGTGTG  
TTCCAGTTTGAACAAGAGTCCACTATTAAGAACGTTGGACTCCAACGTCAAAGGGCGAAAAACCGTCTATCAGGGCGATG  
GCCACTACGTGAACCATCACCTAATCAAGTTTTTGGGGTCGAGGTGCCGTAAAGCACTAAATCGGAACCCCTAAAGGGA  
GCCCCCGATTTAGAGCTTGACGGGGAAAAGCCGGCGAACGTGGCGAGAAAAGGAAGGGAAAGAAAGCCGAAAGGAGCGGGCG  
CTAGGGCGCTGGCAAGTGTAGCGGTACGCTGCGCGTAACCACACACCCGCCGCTTAATGCGCCGCTACAGGGCGC  
GTCAGGTGGCACTTTTCCGGGAAATGTGCGCGGAACCCCTATTTGTTATTTTTCTAAATACATTCAAATATGTATCCGCTCA  
TGAGACAATAACCCTGATAAATGCTTCAATAATATTGAAAAAGGAAGAGTCCCTGAGGCGGAAAAGAACAGCTGTGGAATGT  
GTGTCAGTTAGGGTGTGAAAGTCCCAAGGCTCCCAAGCAGGAGTATGCAAAGCATGCATCTCAATTAGTCAGCAACCATAGTC  
CCGAGGTGGGAAAGTCCCAAGGCTCCCAAGCAGGAGTATGCAAAGCATGCATCTCAATTAGTCAGCAACCATAGTC  
CCGCCCTAACTCCGCCATCCCGCCCTAACTCCGCCAGTTCGCCCATTTCTCCGCCCATGGCTGACTAATTTTTTTT  
ATTTATGCAGAGGCCGAGGCCGCTCGGCCTCTGAGCTATTCCAGAAGTAGTGAGGAGGCTTTTTTGGAGGCCTAGGCTT  
TTGAAAGATCGATCAAGAGACAGGATGAGGATCGTTTCGCATGATTGAACAAGATGGATTGCACGCAGGTTCTCCGGCCG

CTTGGGTGGAGAGGCTATTCGGCTATGACTGGGCACAACAGACAATCGGGCTGCTCTGATGCCGCCGTGTTCCGGCTGTCA  
GCGCAGGGGGCGCCCGTTCTTTTTGTCAAGACCGACCTGTCCGGTGCCTGAATGAACTGCAAGACGAGGCGAGGCGCGGC  
TATCGTGGCTGGCCACGACGGGCTTCCTTGCAGCTGTGCTCGACCTGTGCTACTGAAGCGGGAAGGACTGCGCTGC  
ATTGGGCGAAGTGCCGGGCGAGGATCTCCTGTCTACCTTGCCTGCGGAGAAAGTATCCATCATGGCTGATGCAAT  
GCGGGCGGCTGCATACGCTTGATCCGGCTACCTGCCATTGACCACCAAGCGAAACATCGCATCGAGCGAGCAGTACTC  
GGATGGAAGCCGGTCTTGTGATCAGGATGATCTGGACGAAGAGCATCAGGGGCTCGCGCCAGCCGAAGTTCGCCAG  
GCTCAAGGCGAGCATGCCCGACGCGGAGGATCTCGTCTGACCCATGGCGATGCCTGCTTGCCGAATATCATGTTGAAA  
ATGGCCGCTTTTCTGGATTCATCGACTGTGGCCGGCTGGGTGTGGCGGACCGCTATCAGGACATAGCGTTGGCTACCCGT  
GATATTGCTGAAGAGCTTGGCGGCGAATGGGCTGACCGCTTCTCGTCTTACGGTATCGCCGCTCCCGATTTCGACGG  
CATCGCCTTCTATCGCCTTCTTGACGAGTCTTCTGAGCGGGACTCTGGGGTTTCAAATGACCGACCAAGCGACGCCAAC  
CTGCCATCAGGATTTTCGATTCCACCGCCGCTTCTATGAAAGGTTGGGCTTCGGAATCGTTTTCCGGGACGCCGGCTG  
GATGATCCTCCAGCGCGGGGATCTCATGCTGGAGTCTTTCGCCACCCCTAGGGGGAGGCTAACTGAAACACGGAAGGAGA  
CAATACCGGAAGGAACCCGCGCTATGACGGCAATAAAAAGACAGAATAAAACGCACGGTGTGGGTCGTTTGTTCATAAAC  
GCGGGGTTCCGTTCCAGGGCTGGCACTCTGTCGATACCCACCGAGACCCCAATTGGGCCAATACGCCCGCGTTTCTTC  
CTTTCCACCCACCCCAAGTTTCGGGTGAAGGCCAGGGCTCGCAGCCACCGTCCGGGCGGACGGCCCTGCCATA  
GCCTCAGGTTACTCATATATACTTTAGATTGATTTAAAACCTCATTTTTAATTTAAAAGGATCTAGGTGAAGATCCTTTTTGAT  
AATCTCATGACCAAAATCCCTAACGTGAGTTTTCTTCCACTGAGCGTCAGACCCCGTAGAAAAGATCAAAGATCTTCTT  
GAGATCCTTTTTTCTGCGCGTAATCTGCTGCTTCAAACAAAAAACCACCGCTACCAGCGGTGGTTTGTTCGCCGATCA  
AGAGCTACCAACTCTTTTCCGAAGGTAAGTGGCTTACAGCAGAGCGCAGATACCAAACTGTCTTCTAGTGTAGCCGTA  
GTTAGGCCACCACTTCAAGAATCTGTAGCACCGCCTACATACTCGCTCTGCTAATCCTGTTACCAAGTGGCTGCTGCCAG  
TGGCGATAAGTCTGTCTTACCGGTTGACTCAAGCGATAGTTACCGGATAAGGCGCAGCGGTCGAGCGGCTGAACGGGG  
GGTTCGTGCACACAGCCAGCTTGGAGCGAACGACCTACACCGAACTGAGATACCTACAGCGTGAGCTATGAGAAAGCGC  
CACGTTCCCGAAGGGAGAAAGGCGGACAGGTATCCGTAAGCGGCAGGGTCGGAACAGGAGAGCGCACGAGGGAGCT  
TCCAGGGGGAAACGCTTGTATCTTTATAGTCTGTCCGGTTTCGCCACCTCTGACTTGAGCGTCTGATTTTTGTGATGCTC  
GTCAGGGGGGCGGAGCCTATGAAAAACGCCAGCAACGCGGCCCTTTTTACGGTTCCTGGCCTTTTGTGCTGGCCTTTTGTCT  
ACATGTTCTTCTCGCTTATCCCTGATTCTGTGGATAACCGTATTACCGCCATGCAT

## ZF-VenN

Annotated features:

3\*FLAG

SV40 NLS

ZF

Linker

VenN

Full plasmid sequence:

TAGTTATAATAGTAATCAATTACGGGGTCAATTAGTTCATAGCCCATATATGGAGTTCGCGTTACATAACTTACGGTAAATG  
GCCCCCTGGCTGACCGCCCAACGACCCCCGCCATTGACGTCAATAATGACGTATGTTCCCATAGTAACGCCAATAGGG  
ACTTTCCATTGACGTCAATGGGTGGAGTATTTACGGTAAACTGCCCACTTGGCAGTACATCAAGTGTATCATATGCCAAGTA  
CGCCCCCTATTGACGTCAATGACGGTAAATGGCCCGCTGGCATTATGCCCAGTACATGACCTTATGGGACTTTCCTACTT  
GGCAGTACATCTACGTATTAGTCATCGCTATTACCATGGTGATGCGGTTTTGGCAGTACATCAATGGGCGTGGATAGCGGT  
TTGACTCAGGGGATTTCCAAGTCTCCACCCCAATTGACGTCAATGGGAGTTTGTTCGACCAAAAATCAACGGGACTTTCC  
AAAATGTCGTAACAACTCCGCCCCATTGACGCAAAATGGGCGTAGGCGTGTACCGTGGGAGGCTATATAAGCAGAGGG  
GTTTAGTGAACCGTCAGATCCGCTAGCGCTACCGGTGCCACCATGGACTATAAGGACCACGAGACTACAAGGATC  
ATGATATTGATTACAAAGACGATGACGATAAGCCTAAGAAGAAGCGTAAGGTAGGCGAGAAACCGTACGCTTGCCTGAAT  
GCGGAAAAAGCTTCTCTCAGTCCAGCAACCTCGTGAGGCATCAGAGGACCCATACCGGCGAGAAGCCCTACGCTTGCCCG  
GAGTGTGGCAAGTCAATTCTCCAGGAGCGACAATTTGGTTAGGCATCAACGCACACATACCGGCGAGAAACCGTACGCGTG  
CCCTGAATGCGGTAAGGCTTCTCTGACCCAGGTCACCTGTCCGCCATCAGAGGACCCATACCCTGGATCGTCACAAAAC  
CTCGGGTTCCATCCACGTCGGAAGGCCAGGAGGGCACGCTGAGCAAGGGCGAGGAGCTGTTACCGGGGGTGGTCCCAT  
CCTGGTTCGAGCTGGACGGCGACGTAACCGGCCACAAGTTTACGCGTGTCCGGCGAGGGGCGAGGGCGATGCCACCTACGG  
CAAGCTGACCCCTGAAGCTCATCTGACACCACCGGCAAGCTGCCCGTGCCTGGCCACCCCTCGTGACCACCCCTCGGCTAC  
GGCCTGCAGTGTTCGCCCGCTACCCCGACCATGAAGCAGCAGCAGTCTTCAAGTCCGCCATGCCCGAAGGCTACGT  
CCAGGAGCGCACCATCTTCTCAAGGACGACGGCAACTACAAGACCCGCGCCGAGGTGAAGTTCGAGGGCGACACCCTG  
GTGAACCGCATCGAGCTGAAGGGCATCGACTTCAAGGAGGACGGCAACATCCTGGGCGACAAGCTGGAGTACAACATAAA  
CAGCCACAACGCTATATCACCCGCCGACAAGCAGAAGAACCGGCATCAAGGCCAACCTCAAGATCCGCCACAACATCGAGG  
ACGGCGGCGTGCAGCTCGCCGACCACTACCAGCAGAACACCCCATCGGCGACGGCCCCGTGCTGCTGCCCGACAACCA  
CTACCTGAGCTACCAGTCCAAGCTGAGCAAAGACTAATCCGGACTCAGATCTCGAGCTCAAGCTTCAAGTTCGAGTTCGA  
CGGTACCGCGGGGCCGGGATCCACCGGATCTAGATAACTGATCATAATCAGCCATACCACATTTGTAGAGTTTTACTTGC  
TTTAAAAAACCTCCACACCTCCCTGAACTGAAACATAAAAATGAATGCAATTTGTTGTTAACTGTTTATTGACAGTT  
ATAATGTTACAAAATAAGCAATAGCATCACAATAATGCAAAATAAGCATTTTTTCTACTGCATCTAGTTGTGGTTTTGTCCA  
AACTCAATGTATCTTAAGGCGTAAATTGTAAGCGTTAATTTTTGTTAAAATTCGCGTTAAATTTTTGTTAAATCAGCTCA  
TTTTTAACCAATAGGCCGAAATCGGCAAAATCCCTTATAAATCAAAGAATAGACCGAGATAGGGTTGAGTGTGTTCCAG  
TTTGAACAAGAGTCCACTATTAAGAAGCTGGACTCCAACGTCAAAGGGCGAAAAACCGTCTATCAGGGCGATGGCCCCAC

TACGTGAACCATCACCCATAATCAAGTTTTTTGGGGTCGAGGTGCCGTAAGCACTAAATCGGAACCCTAAAGGGAGCCCC  
GATTTAGAGCTTGACGGGAAAGCCGGCGAACCTGGCGAGAAAGGAAGGAAGAAAGCGAAAGGAGCGGGCGCTAGGG  
CGTTGGCAAGTGTACGGGTACGCTGCGCGTAACCAACCAAGCCCGCTTAATGCGCCGTACAGGGCGCGTCAGG  
TGGCACTTTTCGGGAAATGTGCGCGGAACCCCTATTTGTTATTTTTCTAAATACATTCAAATATGTATCCGCTCATGAGAC  
AATAACCCTGATAAATGCTTCAATAATATTGAAAAAGGAAGAGTCTGAGGCGGAAAGAACCAGCTGTGGAATGTGTGCA  
GTTAGGGTGTGAAAAGTCCCCAGGCTCCCCAGCAGGCAGAAGTATGCAAAGCATGCATCTCAATTAGTCAGCAACCAGGT  
GTGAAAAGTCCCCAGGCTCCCCAGCAGGCAGAAGTATGCAAAGCATGCATCTCAATTAGTCAGCAACCATAGTCCCGCCC  
CTAACTCCGCCATCCCGCCCTAACTCCGCCAGTTCGCCCATTTCCGCCCATGGCTGACTAATTTTTTTATTTATG  
CAGAGGCCGAGGCCCGCTCGGCCTCTGAGCTATTCCAGAAGTAGTGAGGAGGCTTTTTTGGAGGCCTAGGCTTTTTGCAAA  
GATCGATCAAGAGACAGGATGAGGATCGTTTCGCATGATTGAACAAGATGGATTGCACGCAGGTTCTCCGGCCGCTTGGG  
TGGAGAGGCTATTCGGCTATGACTGGGCACAACAGACAATCGGCTGCTCTGATGCCGCCGTGTTCCGGCTGTGAGCGCAG  
GGGCGCCCGTCTTTTTGTCAAGACCGACTGTCCGGTGCCCTGAATGAACTGCAAGACGAGGACGCGCGGTATCGTG  
GCTGGCCACGACGGGCTTCTTTCGCGAGCTGTGCTCGACGTTGTCACTGAAGCGGGAAGGGACTGGCTGCTATTGGGC  
GAAGTCCGGGGCAGGATCTCTGTATCTCACCTTGTCTCCGAGAAAGTATCCATCATGGCTGATGCAATGCGGCG  
GCTGCATACGCTTGTACCGGCTACCTGCCATTCCAGCCCAAGCGAAACATCGCATCGAGCGACGACTACTCGGATGG  
AAGCCGGTCTTGTGATCAGGATGATCTGGACGAAGAGCATCAGGGGCTCGCGCCAGCCGAAGTTCGCCAGGCTCAA  
GGCGAGCATGCCGACGGCGAGGATCTCGTCTGACCCATGGCGATGCCTGCTTCCGAATATCATGGTGGAAAATGGC  
CGTTTTCTGGATTACGACTGTGGCCGGTGGGTGTGGCGGACCGCTATCAGGACATAGCGTTGGCTACCCGTGATAT  
TGCTGAAGAGCTTGGCGGCAATGGGCTGACCGTCTCTCGTCTTACGGTATCGCCGCTCCCGATTTCGAGCGCATCG  
CCTTCTATCGCTTCTTACGAGTCTTCTGAGCGGACTCTGGGGTTCGAAATGACCGACCAAGCGACGCCAACCTGC  
CATCAGGAGATTTGATTCCACCGCCGCTTCTATGAAAAGTTGGGCTTCGGAATCGTTTTCCGGGACGCGCGCTGGATGA  
TCCTCCAGCGCGGGGATCTCATGCTGGAGTTCTTCGCCACCCTAGGGGGAGGCTAACTGAAACACGGAAGGAGACAATA  
CCGGAAGGAACCCGCGCTATGACGGCAATAAAAAGACAGAATAAAACGCACGGTGTGGGTCGTTTGTTCATAAACGCGG  
GGTTCGGTCCCAGGGCTGGCACTCTGTGATACCCACCGAGACCCATTGGGGCCAATACGCCCGCGTTTTCTCTTTTT  
CCCCACCCACCCCAAGTTCGGGTGAAGGCCAGGGCTCGCAGCCAACGTCCGGGCGGCGAGGCCCTGCCATAGCCT  
CAGGTTACTCATATATACTTTAGATTGATTTAAAACCTCATTTTTAAATTTAAAAGGATCTAGGTGAAGATCCTTTTTGATAATCT  
CATGACCAAAATCCCTAACGTGAGTTTTCTGTTCCACTGAGCGTCAGACCCCGTAGAAAAGATCAAAGGATCTTCTTGAGAT  
CCTTTTTTCTGCGCGTAATCTGCTGCTTCAAACAAAAAACCCGCTACCAGCGGTGGTTTGTGGCCGATCAAGAGC  
TACCAACTCTTTTTCCGAAGGTAAGTGGCTTACGACAGAGCGCAGATACCAATACTGCTCTTAGTGTAGCCGTAGTTAGG  
CCACCATTCAAGAAGTCTGTAGCACCGCTACATACCTCGCTCTGCTAATCCTGTTACCAGTGGCTGCTGCCAGTGGCGA  
TAAGTCGTGCTTACCGGTTGGACTCAAGACGATAGTTACCGGATAAGGCGCAGCGGTCCGGCTGAACGGGGGGTTCGT  
GCACACAGCCAGCTTGGAGCGAACGACCTACCCGAAGTACAGTACCTACAGCGTGAAGTATGAGAAAAGCGCCACGCTT  
CCCGAAGGGAGAAAGCGGACAGGATCCGGTAAGCGGCAGGGTCCGGAACAGGAGAGCGCACGAGGGAGCTTCCAGGG  
GGAACGCCTGGTATCTTTATAGTCTGCTGGGTTTCGCCACCTCTGACTTGAGCGTGCATTTTTGTGATGCTCGTCAGGG  
GGGCGGAGCCTATGAAAAACGCCAGCAACCGGCCTTTTTACGGTCTCGCCCTTTGCTGGCCTTTGCTCACATGTT  
TTCTGCGTTATCCCTGATTCTGTGGATAACCGTATTACCGCCATGCAT

## TALE-VenN

Annotated features:

3\*FLAG

SV40 NLS

TALE

Linker

VenN

Full plasmid sequence:

ACGGATCGGGAGATCTCCCGATCCCCTATGGTGCACCTCTCAGTACAATCTGCTCTGATGCCGCATAGTTAAGCCAGTATCT  
GCTCCCTGCTTGTGTGTTGGAGGTCGCTGAGTAGTGCAGGCAAAATTTAAGCTACAACAAGGCAAGGCTTGACCGACA  
ATTCCATGAAGAATCTGCTTAGGTTAGGCGTTTTGCGCTGCTTCGCGATGTACGGGCCAGATACCGCGTTGACATTGAT  
TATTGACTAGTTATTAATAGTAATCAATTACGGGGTCAATTAGTTCATAGCCATATATGGAGTTCGCGTTACATAACTTACG  
GTAATGGCCCGCCTGGCTGACCGCCCAACGACCCCGCCATTGACGTCAATAATGACGTATGTTCCCATAGTAACGCC  
AATAGGGACTTTCCATTGACGTCAATGGGTGGAGTATTTACGGTAACTGCCCACTTGGCAGTACATCAAGTGTATCATATG  
CCAAGTACGCCCTATTGACGTCAATGACGGTAAATGGCCCGCTGGCATTATGCCAGTACATGACCTTATGGGACTTT  
CCTACTTGGCAGTACATCTACGTATTAGTATCATCGCTATTACCATGGTATGCGGTTTTGGCAGTACATCAATGGGCGTGGAT  
AGCGTTTTGACTCACGGGATTTCCAAGTCTCACCCCAATTGACGTCAATGGGAGTTTTGTTTTGGCACCAAAATCAACGGG  
ACTTTCCAAATGTGTAACAACCTCCGCCCAATTGACGCAATGGGCGGTAGGCGTGTACGGTGGGAGGTCTATATAAGCA  
GAGCTCTCCCTATCAGTATAGAGATCTCCCTATCAGTATAGAGATCGTACGACGAGCTCGTTTGTGTAACCGTCAGATCG  
CCTGGAGACGCCATCCACGCTGTTTTGACCTCCATAGAAGACACCGGGACCGATCCAGCCTGGCGCGCGGTTCTGGATC  
CGTTTCAATTGGGTTTACCGGTTAGGGGCCACCATGGACTATAAGGACCACGACGGAGACTCAAGGATCATGATATT  
GATTACAAGACGATGACGATAAGATGGCCCAAAGAAGAGCGGAAGGTCGGTATCCACGGAGTCCAGCAGCCGTAGA  
TTTTGAGAATTTGGGATATTCACAGCAGCAGGAAAAAGATCAAGCCCAAAGTGAGGTCGACAGTCCGCGCAGCATCACG  
AAGCGCTGGTGGGTCATGGGTTTACACATGCCACATCGTAGCCTTGTGCGACGACCCCTGCAGCCCTTGGCACGGTCCGC  
GTCAAGTACCAGGACATGATTCGGCGTTCGCCGAAGCCACACATGAGGCGATCGTCCGTGTGGGGAAACAGTGGAGCC



GAGCCCGAGCGCTTGAGGCCCTGTTGACGGTCGCGGGAGAGCTGAGAGGGCCTCCCTTCAGCTGGACACGGGCCAGTT  
GCTGAAGATCGCGACGGGGAGGAGTACGCGCGGTGAGGGCGTGCACGCGTGGCGCAATGCGCTCACGGGAGCACC  
CCTCAACCTGACCCAGAGCGAGGTCGTGGCAATTGCGAGCAACATCGGGGAAAGCAGGCACTCGAAACCGTCCAGAGG  
TTGCTGCCTGTGCTGTGCCAAGCGCACGGACTTACGCCAGAGCAGGTCGTGGCAATTGCGAGCAACCACGGGGAAAGC  
AGGCACTCGAAACCGTCCAGAGGTTGCTGCCTGTGCTGTGCCAAGCGCACGGACTAACCCAGAGCAGGTCGTGGCAATT  
GCGAGCAACATCGGGGAAAGCAGGCACTCGAAACCGTCCAGAGGTTGCTGCCTGTGCTGTGCCAAGCGCACGGGTTGA  
CCCCAGAGCAGGTCGTGGCAATTGCGAGCCATGACGGGGAAAGCAGGCACTCGAAACCGTCCAGAGGTTGCTGCCTGT  
CCTGTGCCAAGCGCACGGCTGACCCAGAGCAGGTCGTGGCAATTGCGAGCAACATCGGGGAAAGCAGGCACTCGAA  
ACCGTCCAGAGGTTGCTGCCTGTGCTGTGCCAAGCGCACGGACTTACACCCGAACA  
ACGGGGAAAGCAGGCACTCGAAACCGTCCAGAGGTTGCTGCCTGTGCTGTGCCAAGCGCACGGACTTACACCCGAACA  
AGTCGTGGCAATTGCGAGCAACATCGGGGAAAGCAGGCACTCGAAACCGTCCAGAGGTTGCTGCCTGTGCTGTGCCA  
GCGCACGGACTTACGCCAGAGCAGGTCGTGGCAATTGCGAGCAACATCGGGGAAAGCAGGCACTCGAAACCGTCCAGA  
GGTTGCTGCCTGTGCTGTGCCAAGCGCACGGACTAACCCAGAGCAGGTCGTGGCAATTGCGAGCAACCACGGGGAAAG  
CAGGCACTCGAAACCGTCCAGAGGTTGCTGCCTGTGCTGTGCCAAGCGCACGGTTGACCCAGAGCAGGTCGTGGCA  
ATTGCGAGCCATGACGGGGAAAGCAGGCACTCGAAACCGTCCAGAGGTTGCTGCCTGTGCTGTGCCAAGCGCACGGC  
TGACCCAGAGCAGGTCGTGGCAATTGCGAGCAACATCGGGGAAAGCAGGCACTCGAAACCGTCCAGAGGTTGCTGCC  
TGTGCTGTGCCAAGCGCACGGACTGACACCAGAGCAGGTCGTGGCAATTGCGAGCAACGGAGGGGAAAGCAGGCACTC  
GAAACCGTCCAGAGGTTGCTGCCTGTGCTGTGCCAAGCGCACGGCCTCACCCAGAGCAGGTCGTGGCAATTGCGAGCA  
ACGGAGGGGAAAGCAGGCACTCGAAACCGTCCAGAGGTTGCTGCCTGTGCTGTGCCAAGCGCACGGACTTACGCCAGA  
GCAGGTCGTGGCAATTGCGAGCCATGACGGGGAAAGCAGGCACTCGAAACCGTCCAGAGGTTGCTGCCTGTGCTGTGC  
CAAGCGCACGGACTAACCCAGAGCAGGTCGTGGCAATTGCGAGCAACGGAGGGGAAAGCAGGCACTCGAAACCGTCC  
AGAGGTTGCTGCCTGTGCTGTGCCAAGCGCACGGTTGACCCAGAGCAGGTCGTGGCAATTGCGAGCCATGACGGGG  
AAAGCAGGCACTCGAAACCGTCCAGAGGTTGCTGCCTGTGCTGTGCCAAGCGCACGGCCTGACCCAGAGCAGGTCGT  
GCAATTGCGAGCAACATCGGGGAAAGCAGGCACTCGAAACCGTCCAGAGGTTGCTGCCTGTGCTGTGCCAAGCGCACG  
GACTGACACCAGAGCAGGTCGTGGCAATTGCGAGCAACCGGGGAAAGCAGGCACTCGAAACCGTCCAGAGGTTGCT  
GCCTGTGCTGTGCCAAGCGCACGGACTCACGCTGACAGGTCGTGGCAATTGCAATCAACATCGGGGACAGCCGCA  
CTGGAGTCAATCGTGGCCAGCTTTCAGAGCCGACCCCGCTGAGCCGCACTACTAATGATCATCTTGTAGCGCTGGC  
CTGCCTCGGGGACGACCCGCTTGGATGCGGTGAAGAAGGGGCTCCCGCACGCGCCTGCATTGATTAAGCGGACCAAC  
AGAAGGATTCGGAGAGGACATCACATCGAGTGGCAGGCTGCAGGGAAGTGAAGTGTGAGCAAGGGGCGAGGAGCTGT  
TCACCGGGGTGGTGGCCATCCTGGTTCGAGCTGGACGGCAGCTAAACGGCCACAAGTTCAGCGTGTCCGGGCGAGGGCGA  
GGGCGATGCCACCTACGGCAAGCTGACCCCTGAAGCTCATCTCACCCAGGCAAGCTGCCCGTGCCTTGGCCACCCTC  
GTGACCACCTCGGCTACGGCTGCAGTCTTCCGCCCTACCCGACCCACATGAAGCAGCAGCAGCTTCTCAAGTCCGC  
CATGCCCGAAGGCTACGTCCAGGAGCGCACCATCTTCTTCAAGGACGACGGCAACTACAAGACCCGCGCGAGGTGAAGT  
TCGAGGGGACACCCCTGGTGAACCGCATCGAGCTGAAGGGCATCGACTTCAAGGAGGACGGCAACATCCTGGGGCACA  
GCTGGAGTACAACATAACAGCCACAACGTCTATACCCGCGGACAAGCAGAAGAACGGCATCAAGGGCAACTTCAAGAT  
CCGCCACAACATCGAGGACGGCGGGCTGCAGCTCGCCGACCACTACCAGCAGAACACCCCATCGGGCAGCGGCCCCGT  
GCTGCTGCCGACAACCACTACCTGAGTACCAGTCCAAGTTCGAGCAAGACTAATCTAGAGGGGCGGCTTAAACCCGCT  
GATCAGCCTCGACTGCTCCTTCTAGTTGCCAGCCATCTGTTGTTGCCCTCCCGCTGCCTTGCCTTGCCTTGAAGGTTG  
CCACTCCCACTGCTCCTTCTAATAAAATGAGGAAATGCAATCGCATTGTCTGAGTAGGTCATTCTATTCTGGGGGGTGG  
GGTGGGGCAGGACAGCAAGGGGGAGGATTGGGAAGACAATAGCAGGCATGCTGGGGATGCGGTGGGCTCTATGGCTTCT  
GAGGCGGAAAGAACAGCTGGGGCTTAGGGGTATCCCCACGCGCCTGTAGCGGCGCATTAAAGCGCGCGGGTGTG  
GTGGTTACGCGCAGCGTACCGCTACACTTGCAGCGCCCTAGCGCCCGCTCCTTTGCTTTCTTCCCTTCTTCTCGCC  
ACGTTCCGCGCTTCCCGTCAAGCTCTAAATCGGGGCTCCCTTAAAGGTTCCGATTAGTGTCTTACGGCACCTCGAC  
CCAAAAAATTTAGTTAGGTTGATGGTTACAGTGTGGGCCATGCCCTGATAGACGGTTTTTTCGCCCTTTGACGTTGGAG  
TCCACGTTCTTAAATAGTGGACTCTGTTCCAAACTGGAACAACACTCAACCCATCTCGGTCTATTCTTTGATTTATAAGG  
GATTTTGGCGATTTGGCCCTATTGGTTAAAAAATGAGCTGATTTAACAATAATTAACGCGAATTAATTCTGTGGAATGTGTG  
TCAGTTAGGGTGTGGAAGTCCCCAGGCTCCCCAGCAGGACAGGATGCAAAAGCATGCATCTCAATTAAGTACGAACCA  
GGTGTGGAAGTCCCCAGGCTCCCCAGCAGGACAGGATGCAAAAGCATGCATCTCAATTAAGTACGAACCAATAGTCCCG  
CCCTAACTCCGCTCCGCTCCGCTAACTCCGCTCCGCTTCCGCTTCCGCTTCCGCTTCCGCTTCCGCTTCCGCTTCCGCT  
ATGCAAGGCGGAGGCGCCCTCTGCCTCTGAGCTATTCCAGAAGTGTGAGGAGGCTTTTTTGGAGGCTTAGGCTTTTGC  
AAAAAGTCCCGGGAGCTTGTATATCCATTTTCGGATCTGATCAGCAGCTGATGAAAAAGCCTGAACTACCCGCGACGTCT  
GTCGAGAAGTTTCTGATCGAAAAGTTCGACAGCGTCTCCGACCTGATGCAGCTCTCGAGGGGCAAGAATCTCGTGTCTTC  
AGCTTCGATGTAGGAGGGCGTGGATATGCTCCTGCGGGTAAATAGCTGCGCCGATGGTTTCTACAAAGATCGTTATGTTTAT  
CGGCACTTTGCATCGGCCGCTCCCGATTCCGGAAAGTCTGACATTGGGGAAATTCAGCGAGAGCCTGACCTATTGCAT  
CTCCCGCTGACAGGGTGTACGTTGCAAGACTGCCTGAAACCGAACTGCCCGCTGTTCTGCAGCCGCTCGCGGAG  
GCCATGGATGCGATCGCTGCGGCCGATCTTAGCCAGACGAGCGGGTTCGGCCATTCCGACCGCAAGGAATCGGTCAAT  
ACACTACATGGCGTATTTCATATGCGCGATTGCTGATCCCCATGTGTATCACTGGCAACTGTGATGGACGACACCGTCA  
GTGCGTCCGTGCGCAGGCTCTCGATGAGCTGATGCTTTGGGCCGAGGACTGCCCGAAGTCCGGCACCTCGTGCACGC  
GGATTTCCGCTCCAACAATGTCCTGACGGAACAATGGCCGATAACAGCGGTCATTGACTGGAGCGAGGCGATGTTCCGGG  
ATTCCCAATACGAGGTCGCCAACATCTTCTGAGGCGGCTGGTGGCTTGTATGGAGCAGCAGCGCTACTTCGAG  
CGGAGCATCCGGAGTTCGAGGATCGCCGCGCTCCGGCGTATATGCTCCGCTATTGGTCTTGACCAACTCATACAGAG  
CTTGGTTGACGGCAATTTGATGATGAGCTTGGGCGCAGGTCGATGCGACGCAATCGTCCGATCCGGAGCCGGGACT  
GTCGGGCGTACACAAATCGCCGAGAAAGCGCGGCCGCTGACCGGATGGCTGTGTAGAAGTACTCGCCGATAGTGGAA  
ACCGACGCCCCAGCACTCGTCCGAGGGCAAAGGAATAGCACGTGCTACGAGATTTGATTCCACCGCCGCTTCTATGAA  
AGTTGGGCTTCGGAATCGTTTCCGGGACGCGGCTGGATGATCTCCAGCGCGGGGATCTCATGCTGGAGTTCTTCGC  
CCACCCAACTGTTTATTGCAGCTTATAATGGTTACAATAAAGCAATAGCATCACAAATTTACAAATAAAGCATTTTTTTC  
ACTGCACTTAGTTGTGTTTTGTCCAAACTCATCAATGTATCTTATCATGTCTGTATACCGTCCGACTCGTAGAGTTGG  
CGTAATCATGGTCAATAGCTGTTTCTGTGAAATTTATCCGCTCACAATTCACACAACATACGAGCCGGAAGCATAAA  
GTGTAAGCCTGGGGTGCCTAATGAGTGAAGTAACTCACATTAATGCGTTGCGCTCACTGCCCGCTTCCAGTCCGGAAA  
CCTGTGCTGCCAGCTGCATTAATGAATCGGCCAACGCGCGGGGAGAGGCGGTTTTGCTATTGGGCGCTTCCGCTTCC  
CGTCACTGACTCGCTGCGCTCGTTCGGCTGCGGGCAGCGGATCAGCTCACTCAAAGGCGGTAATACGGTTATCC  
ACAGAATCAGGGGATAACGCAGGAAGAATGTGAGCAAAAGGCCAGCAAAGGCCAGGAACCGTAAAAGGCCGCGTT

GCTGGCGTTTTTCATAGGCTCCGCCCCCTGACGAGCATCACAAAATCGACGCTCAAGTCAGAGGTGGCGAAACCCGA  
CAGGACTATAAAGATACCAGGCGTTTTCCCCCTGGAAGCTCCCTCGTGCCTCTCCTGTTCCGACCCTGCCGCTTACCGGAT  
ACCTGTCCGCTTTTCCCTTCGGGAAGCGTGGCGCTTTTTCATAGCTACGCTGTAGGTATCTAGTTCGGTGTAGGTGCG  
TTCGCTCCAAGCTGGGCTGTGTGCACGAACCCCGTTTCCGCCCCAGCCGCTGCGCCTTATCCGGTAACTATCGTCTTGAG  
TCCAACCCGGTAAGACACGACTTATCGCCACTGGCAGCAGCCACTGGTAACAGGATTAGCAGAGCGAGGTATGTAGGCGG  
TGCTACAGAGTTCTTGAAGTGGTGGCCTAACTACGGTACACTAGAGAAGACAGTATTTGGTATCTGCGCTCTGCTGAAGCC  
AGTTACCTTCGGAAAAAGAGTTGGTAGCTCTTGATCCGGCAAACAAACCACCGCTGGTAGCGGTTTTTTTTGTTTGAAGCA  
GCAGATTACGCGCAGAAAAAAGGATCTCAAGAAGATCCTTTGATCTTTTCTACGGGGTCTGACGCTCAGTGAACGAAAA  
CTCACGTTAAGGGATTTTGGTCATGAGATTATCAAAAAGGATCTTACCTAGATCCTTTTTAAATTAATAAATGAAGTTTTAAATC  
AATCTAAAGTATATATGAGTAACTTGGTCTGACAGTTACCAATGCTTAATCAGTGAGGCACCTATCTCAGCGATCTGTCTAT  
TTCGTTTATCCATAGTTGCTGACTCCCCGTCGTGTAGATAACTACGATACGGGAGGGCTTACCATCTGGCCCCAGTGCTG  
CAATGATACCGCGAGAACCACGCTACCCGCTCCAGATTTATCAGCAATAAACAGCCAGCCGGAAGGGCCGAGCGCAGA  
AGTGGTCTGCAACTTTATCCGCTCCATCCAGTCTATTAATTGTTGCCGGGAAGCTAGAGTAAGTAGTTCGCCAGTTAATA  
GTTTGGCAACGTTGTTGCCATTGCTACAGGCATCGTGGTGTACGCTCGTCTTTGGTATGGCTTCACTCAGCTCCGGTT  
CCCAACGATCAAGCGAGTTACATGATCCCCATGTTGTGCAAAAAGCGGTTAGCTCCTCCGTCCTCCGATCGTTGTCA  
GAAGTAAGTTGGCCGAGTGTATCACTCATGGTTATGGCAGCACTGCATAATTCTTACTGTATGCCATCCGTAAGATG  
CTTTTCTGTGACTGGTGAAGTCAACCAAGTCACTTGTGAGAATAGTGTATGCGGCGACCGAGTTGCTCTTGGCCGGCGTC  
AATACGGGATAATACCGCGCCACATAGCAGAACCTTAAAAAGTGCTCATCATTGAAAAAGCTTCTCCGGGGCGAAAACTCTCA  
AGGATCTTACCGCTGTTGAGATCCAGTTCGATGTAACCCACTCGTGCACCCAACTGATCTTACGATCTTTTACTTTACCA  
GCGTTTCTGGGTGAGCAAAAACAGGAAGGCAAAATGCCGCAAAAAGGGAATAAGGGCGACACGGAAATGTTGAATACT  
ATACTCTTCCCTTTTCAATATTATTGAAGCAATTTATCAGGGTTATTGTCTCATGAGCGGATACATATTTGAATGTATTTAGAAA  
AATAAACAAATAGGGGTTCCGCGCACATTTCCCGAAAAAGTGCCACCTGACGTC

## CRISPR/dCas9-VenN

Annotated features:

SV40 NLS

Linker

dCas9

VenN

Full plasmid sequence:

TGGAAGGGCTAATTCCTCCCAAGAAGACAAGATATCCTTGATCTGTGGATCTACCACACACAAGGCTACTTCCCTGATTA  
GCAGAACTACACACCAGGGCCAGGGTTCAGATATCCACTGACCTTTGGATGGTGTACAAAGTAGTACCAGTTGACCCAG  
ATAAGGTAGAAGAGGCCAATAAAGGAGAGAACACCAGCTTGTACACCCTGTGAGCCTGCATGGGATGGATGACCCGGAG  
AGAGAAGTGTAGAGTGGAGTTTGACAGCCGCTAGCATTTCATCAGCTGGCCCGAGAGCTGCATCCGGAGTACTTCAA  
GAAGTGTGATATCGAGCTTGGCTACAAGGGACTTTCCGCTGGGGACTTTCCAGGGAGGCGTGGCCTGGGCGGGACTGGG  
GAGTGGCGAGCCCTCAGATCCTGCATATAAGCAGCTGCTTTTTGCCTGTACTGGGTCTCTCTGGTTAGACCAGATCTGAGC  
CTGGGAGCTCTCTGGCTAACTAGGGAACCCACTGCTTAAGCCTCAATAAAGCTTGCCTTGAAGTGTCTCAAGTAGTGTGTC  
CCGTCTGTTGTGTGACTCTGGTAACTAGAGATCCCTCAGACCCTTTTGTAGTGTGGAAAATCTCTAGCAGTGGCGCCCG  
AACAGGGACTTGAAAGCGAAAGGGAAACCAGAGGAGCTCTCTCGACGCAGGACTCGGCTTGTGAAGCGCGCACGGCAA  
GAGGCGAGGGCGGCGACTGGTGTAGTACGCCAAAAATTTGACTAGCGGAGGCTAGAAGGAGAGATGGGTGCGAGAG  
CGTCAGTATTAAGCGGGGAGAAATTAGATCGCGATGGGAAAAAATTCGGTTAAGGCCAGGGGAAAGAAAAAATAAAT  
AAAACATATAGTATGGGCAAGCAGGGAGCTAGAACGATTTCGAGTTAATCCTGGCCTGTTAGAAACATCAGAAGGCTGTAG  
ACAAACTACTGGGACAGCTACAACCATCCCTTACAGACAGGATCAGAAGAAGTATAGATCATTATATAATACAGTAGCAACCCTC  
TATTGTGTGCATCAAAGATAGAGATAAAGACACCAAGGAAGCTTTAGACAAGATAGAGGAAGAGCAAAAACAAAAGTAA  
ACCACCGCACAGCAAGCGGCCCGCCGCTGATCTTACAGCTGGAGGAGGAGATATGAGGGACAATTGGAGAAGTGAATTA  
TATAAATATAAAGTAAAGTAAAAATTAAGCAATTAAGGACTAGCACCACCAAGGCAAGGAAAGAGAGTGGTGCAGAGAAAAA  
GAGCAGTGGGAATAGGAGCTTTGTTCCCTGGGTTCTTGGAGCAGCAGGAAAGCACTATGGGCGCAGCGTCAATGACGCTG  
ACGGTACAGGCCAGACAATTATTGTCTGGTATAGTGCAGCAGCAGAACAATTTGCTGAGGGCTATTGAGGCGCAACAGCAT  
CTGTTGCAACTCACAGTCTGGGGCATCAAGCAGCTCCAGGCAAGAACTCTGGCTGTGGAAAGATACCTAAAGGATCAACAG  
CTCCTGGGGATTTGGGGTGTCTGGAAGAACTCATTGTCACCCTGCTGTGCCTTGAATGCTAGTTGGAGTAATAAATCTC  
TGAACAGATTTGGAATCACAGCAGCTGGATGGAGTGGGACAGAGAAATTAACAATTACACAAGCTTAATACACTCCTTAAT  
TGAAGAACTCGAAAACAGCAAGAAAAAGTAAACAAAGAAATTTGGAATTAGATAAATGGGCAAGTTTGTGGAATGGTTT  
AACATAACAAAATGGCTGTGGTATATAAAAATTTTACATAATGATAGTAGGAGGCTTGGTAGGTTAAGAATAGTTTTGCTGT  
ACTTTCTATAGTGAATAGAGTTAGGCAGGGATATCCACATTATCGTTTCAGACCCACCTCCCAACCCCGAGGGGACCCGA  
CAGGCCCGAAGGAATAGAAGAAGAAGGTGGAGAGAGAGACAGAGACAGATCCATTCGATTAGTGAACGGATCTCGACGGT  
ATCGCCGAATTGACAAATGGCAGTATTCACCAATTTTAAAAAGAAAAGGGGGGATTTGGGGGTACAGTGCAGGGGAAAG  
AATAGTAGACATAATAGCAACAGACATACAACTAAAGAAATTAACAAAACAAATTAACAAAATTTCAAAAATTTCCGGTTTTATTA  
CAGGGACAGCAGAGATCCAGTTTGGACTAGCGATGCTAGCTGATCGGGGCCCTAGTTATTAATAGTAATCAATTACGGGGT  
CATTAGTTTATAGCCCATATATGGAGTTCGCGTTACATAACTTACGGTAAATGGCCCGCTGGCTGACCGCCCAACGACC  
CCCGCCATTGACGTCAATAATGACGTATGTTCCCATAGTAACGCCAATAGGGACTTTCCATTGACGTCAATGGGTGGAGT  
ATTTACGGTAAACTGCCACTTGGCAGTACATCAAGTGTATCATATGCCAAGTACGCCCTTATTGACGTCAATGACGGTAA  
ATGGCCCGCTGGCATTATGCCAGTACATGACCTTATGGGACTTTTCTACTTGGCAGTACATCTACGTATTAGTCATCGT

ATTACCATGGTGATGCGGTTTTGGCAGTACATCAATGGGCGTGGATAGCGGTTTTGACTCACGGGGATTTCCAAGTCTCCAC  
CCCATTGACGTCAATGGGAGTTTTGTTTTGGCACCAAAATCAACGGGACTTTCCAAAATGTCGTAAACAATCCGCCCCATTA  
CCAAATGGGCGGTGACGGTGTACGGTGGGAGGTCTATATAAGCAGAGCTCCCTATCAGTAGAGATGATGATGATGATGATG  
GTGATAGACATCGTCGACGAGCTCGTTTGTGAACCGTCAGATCGCTGGAGACGCCATCCACGCTGTTTTGACCTCCATA  
GAAGACACCGGGACCGATCCAGCCTACCGTTAAGGTGAACGCGTGCAGGCTGGCGCCACCATGGCCCTAAAAGAAA  
CGCAAGGTCGAATTCGGAAGCGGAAGCGACAAGAAGTACTCCATTGGGCTCGCTATCGGTACCAACAGCGTGGGCTGGG  
CCGTCATTACGGACGAGTACAAGTGCCGAGCAAAAAATCAAAGTTCTGGGCAATACCGATCGCCACAGCATAAAGAAGA  
ACCTCATTGGAGCCCTCTGTTGACTCCGGGGAGACGGCCGAAGCCACGCGGCTCAAAGAACAGCACGGCGCAGATA  
TACCCGAGAAAAGAAATCGGATCTGCTACCTGCAGGAGATCTTTAGTAATGAGATGGCTAAGGTGGATGACTCTTTCTCCAT  
AGGCTGGAGGAGTCTTTTTGGTGGAGGAGGATAAAAAGCACGAGCGCCACCCAATCTTTGGCAATATCGTGGACGAGGT  
GGCGTACCATGAAAAGTACCCAACCATATATCATCTGAGGAAGAAGCTGGTAGACAGTACTGATAAGGCTGACTTGCGGTT  
GATCTATCTCGCGCTGGCGCACATGATCAAATTCGGGGACACTTCTCATCGAGGGGGACCTGAACCCAGACAACAGCG  
ATGTCGACAAAATCTTTATCCAATGTTTCAGACTTACAATCAGCTTTTCGAGGAGAACCCGATCAACGCATCCGGCGTTGA  
CGCAAAGCAATCTGAGCGCTAGGCTGTCAAATCCCGCGGCTCGAAAACCTCATCGCACAGCTCCCTGGGGAGAAGA  
AGAACGGCTGTTTTGTAATCTTATCGCCCTGTACTCGGGCTGACCCCAACTTTAAATCTAAATCGACCTGGCCGAAG  
ATGCCAAGCTGCAACTGAGCAAAGACACCTACGATGATGATCTCGACAATCTGCTGGCCAGATCGGCGACCAGTACGCA  
GACCTTTTTTTGGCGCAAAGAACCTGTCAGACGCCATCTGCTGAGTGAATTTCTGCGAGTGAACACGGAGATCACAAA  
GCTCCGCTGAGCGCTAGTATGATCAAAGCGCTATGATGAGCACCAACAGACTTGACTTTGCTGAAGGCCCTTGTGACAGC  
CAACTGCCTGAGAAGTACAAGGAAATTTCTTCGATCAGTCTAAAAATGGCTACGCCGATACATTGACGGCGGAGCAAGC  
CAGGAGGAATTTACAAAATTTAAGCCCATCTGAAAAAATGGACGGCACCGAGGAGCTGCTGTTAAAGCTGAACAGA  
GAAGATCTGTTGCGCAAACAGCGCACTTTGACAATGGAAAGCATCCCCACCAGATTCACCTGGGCGAECTGCACGCTATC  
CTCAGGCGGCAAGAGGATTTCTACCCCTTTTTGAAAGATAACAGGGAAAAGATTGAGAAAATCCTCACATTTGCGATACCT  
ACTATGTAGGCCCTCGCTCGGGGAAATTCAGATTCGCGTGGATGACTCGCAAATCAGAAGAGACCATCACTCCCTGG  
AACTTCGAGGAAGTCTGGATAAGGGGGCCTCTGCCAGTCTTCATCGAAAGGATGACTAACTTTGATAAAAATCTGCCT  
AACGAAAAGGTGCTTCTAAACACTCTGCTGTACGAGTACTTACAGCTTTATAACGAGCTCACCAAGTCAAATACGTC  
CAGAAGGATGAGAAAGCCAGCAGCTGTCTGGAGAGCAGAAGAGCTATCGTGGACCTCTTCAAGACGAAACCGG  
AAAGTTACCGTGAACAGCTCAAAGAAGACTATTTCAAAAAGATTGAATGTTTCGACTCTGTTGAAATCAGCGGAGTGGAG  
ATCGCTTCAACGCATCCCTGGGAACGATCACGATCTCTGAAAATCATTAAAGACAAGGACTTCTGGACAATGAGGAGA  
ACGAGGACATTTGAGGACATTTGCTCACCCTACGTTGTTGAAAGATAGGGAGATGATTGAAGAACGCTTGAAAACCTA  
CGCTCATCTTTCGACGACAAAGTCATGAAACAGCTCAAGAGACGCCGATATACAGGATGGGGGGCGGCTGTAAGAAAAC  
TGATCAATGGCATCCGACAGCAGAGTGGAAAGCAATCTGGATTTTCTAAGTCCGATGGATTTGCCAACCCGGAAGT  
TACTGCAGTTGATCCATGATGACTCTCACTTTAAGGAGGACATCCAGAAAAGCACAAGTTTCTGGCCAGGGGACAGTC  
TTCACGAGCACATCGTAATCTTGCAGGTAGCCAGCTATCAAAAAGGGAATACTGCAGACCGTTAAGGTGCTGGATGAAC  
TCGTCAAAGTAATGGGAAGGCATAAGCCCGAGAATATCGTTATCGAGATGGCCCGAGAGAACCAAATACCAGAAAGGA  
CAGAAGAACAGTAGGGAAAGGATGAAGAGGATTGAAGAGGGTATAAAAAGAACTGGGGTCCCAAATCCTTAAGGAACCCC  
AGTTGAAAACACCCAGCTTCAAGATGAGAAGCTTACTGTACTACCTGCAGAACGGCAGGGACATGTACGTGGATCAGGA  
ACTGGACATCAACCGTTTCCGACTACGACGTGGATGCTATCGTCCCAAAGCTTTCTCAAAGATGATTCTATTGATAAT  
AAAGTTGACAAGATCCGATAAAAATAGAGGGGAAGAGTGAATAACCTCCCTCAGAAGAAGTTGTCAAAGAAAATGAAAAAT  
ATTGGCGGCAGCTGCTGAACGCCAAACTGATCACACAACGGAAGTTGATAATCTGACTAAGGCTGAACGAGGTGCCTG  
TCTGAGTTGGATAAAGCCGGCTTCATCAAAGGCAGCTTGTGAGACACGCCAGATCACCAGCACGTGGCCCAAATTTCTC  
GATTCACGCATGAACACCAAGTACGATGAAAATGACAAACTGATTCGAGAGGTGAAAAGTTATFACTCTGAAGTCTAAGCTGG  
TCTCAGATTTAGAAAAGGACTTTCAGTTTTATAAGGTGAGAGAGATCAACAATTACCACCATGCGCATGATGCCTACCTGAA  
TGCAGTGGTAGGACTGCACCTTATCAAAAATATCCAAAGCTGGAATCTGAATTTGTTACGGAGACTATAAAGTGTACGAT  
GTTAGGAAAATGATCGAAAAGTCTGAGCAGGAAAATAGGCAAGGCCACCGCTAAGTACTTCTTTTACAGCAATATTGAAAT  
TTTTCAAGACCGAGATTACTGGCCAATGGAGAGATTGGAAGCGACCCTTATCGAAACAACGGAGAAAACAGGAGAAA  
TCGTGTGGGACAAGGGTAGGGATTTGCGGACAGTCCGCAAGGTCTGTCCATGCCGAGGTGAACATCGTTAAAAAGACC  
GAAGTACAGACCGGAGGCTTCTCAAAGGAAAGTATCCTCCCGAAAAGGAACAGCGACAAGCTGATCGCACGCAAAAAAGA  
TTGGGACCCCAAGAAATACGGCGGATTCGATTTCTCTACAGTCTGACTGACTGTTGTTGGCCAAAGTGGGAAAGG  
GAAGTCAAAAAGCTAAAAGCGTCAAGGAACTGTGGCATCACAATCATGGAGCGATCCAGCTTCAAGAAAAACCCCA  
CGACTTTCTCGAAGCGAAAGGATATAAAGAGGTCAAAAAGACCTCATTAAGCTGCCAAGTACTCTCTTTGAGCTT  
GAAAACGGCCGAAACGAATGCTCGCTAGTGCGGCGAGCTGCAGAAAGGTAACGAGCTGGCACTGCCCTCAAATACGT  
TAATTTCTTGATCTGGCCAGCCACTATGAAAAGCTCAAAGGTTCTCCGAAAGATAATGAGCAGAAGCAGCTGTTCTGGA  
ACAACACAAACTACCTTGATGAGATCATCGAGCAAATAAGCGAGTTCTCCAAAAGAGTATCCTCGCCGACGCTAACCT  
CGATAAGGTGCTTTCTGCTTACAATAAGCACAGGGATAAGCCCATCAGGGAGCAGGCAGAAAACATTATCACTTGTACT  
CTGACCAACTTGGGCGCGCCTGCAGCCTTCAAGTACTTGCACACCACCATAGACAGAAAGCGGTACACCTCTACAAAGGA  
GGTCTGGACGCCACACTGATTCATCAGTCAATACGGGGCTCTATGAAACAAGAAATCGACCTCTCTCAGCTCGGTGGAGA  
CGGCTCTACTAGTGGCTCTCCCAAGAAGAAGAGGAAGGTAGGATCCGGAAGTATGGTGAAGCAAGGGCGAGGAGCTTTCA  
CCGGGGTGGTGCCCATCCTGGTGCAGCTGGACGGCGACGTAACCGCCACAAGTTACGCGTGTCCGGCGAGGGCGAGG  
GCGATGCCACCTACGGCAAGCTGACCCTGAAGCTCATGACCACCCGGCAAGCTGCCCGTGCCCTGGCCCAACCTCGT  
GACCACCTCGGCTACGGCTGCAGTCTTCCGCTGCTACCCCGACACATGAAGCAGCAGCAGCTTCTCAAGTCCGCCA  
TGCCCGAAGGCTACGTCAGGAGCGCACCATCTTCTCAAGGACGAGCGCAACTACAAGACCCCGCCGAGGTTGAAGTT  
GAGGGCGACACCCCTGGTGAACCGCATCGAGCTGAAGGGCATCGACTTCAAGGAGGACGGCAACATCCTGGGGCACAAGC  
TGGAGTACAACATAACAGCCACAAGCTCTATATACCCGCGGACAAGCAGAAGAAGCGCATCAAGGCCAACTTCAAGATCC  
GCCACAACATCGAGGACGGCGGCTGCAGCTCGCCGACCACTACCAGCAGAACACCCCATCGGGCAGGGCCCCGTGCT  
GCTGCCCGACAACCACTACCTGAGCTACCAGTCCAAGCTGAGCAAAAGACTAATCTAGATAATCAACCTCTGGATTACAAAAT  
TTGTGAAGATGACTGTATTCTTAACTATGTTGCTCTTTTACGCTATGTGGATACGCTGCTTTAATGCCTTTGTATCAT  
CTATTGCTCCCGTATGCTTTTCAATTTCTCCTCTTGTATAAAATCCTGTTGCTGCTCTTTATGAGAGTTTGGCCCGTT  
GTCAGGCAACGTGGCGTGGTGTGCACTGTGTTGCTGACGCAACCCCACTGGTTGGGGCATTGCCACCACCTGTCAGCT  
CCTTTCCGGGACTTTGCTTTCCCTCCCTATTGCCACGGCGGAAGTCAATCGCCGCTGCCTTGCCTGCTGCTGCTGCT  
GGGCTCGGCTGTTGGGCACTGACAATCCGTGGTGTGTCGGGAAATCATCGTCTTTCTTGGCTGCTCGCCTGTGTT  
GCCACCTGGATTCTGCGCGGACGCTCTTCTGCTACGCTCCTTCCGCCCTCAATCCAGCGGACCTTCTTCCCGCGGCT  
GCTGCCGGCTCTGCGGCTCTTCCGCTTCCGCTTCCGCTCAGACGAGTCGGATCTCCCTTTGGCCGCTCCTCCCGC

CTGAGATCCTTTAAGACCAATGACTTACAAGGCAGCTGTAGATCTTAGCCACTTTTTAAAAGAAAAGGGGGGACTGGAAGG  
GCTAATTCACCTCCCAACGAAGACAAGATCTGCTTTTTGCTTGTACTGGGTCTCTCTGGTTAGACCAGATCTGAGCCTGGGA  
GCTCTCTGGCTAACTAGGGAACCCACTGCTTAAGCCTCAATAAAGCTTGCCTTGAGTGCTTCAAGTAGTGTGTGCCCGTCT  
GTTGTGTGACTCTGGTAACTAGAGATCCCTCAGACCCCTTTTAGTCAGTGTGGAAAATCTCTAGCAGTAGTAGTTCATGTTCAT  
CTTATTATTCAGTATTTATAAATTGCAAAGAAATGAATATCAGAGAGTGAGAGGCCCGGGTTAATTAAGGAAAGGGCTAGAT  
CATTCTTGAAGACGAAAGGGCCTCGTGATACGCCTATTTTTATAGTTAATGTTCATGATAATAATGGTTTTCTTAGACGTCAGG  
TGGCACTTTTCGGGGAAATGTGCGCGGAACCCCTATTTGTTATTTTTCTAAATACATTCAAATATGTATCCGCTCATGAGAC  
AATAACCCTGATAAATGCTTCAATAATATTGAAAAAGGAAGAGTATGAGTATTCAACATTTCCGTGTCGCCCTTATCCCTTT  
TTTGGCGCATTTTTGCCTTCCCTGTTTTTGTCTACCCAGAAAACGCTGGTGAAAGTAAAAGATGCTGAAGATCAGTTGGGTGCAC  
GAGTGGGTACATCGAACTGGATCTCAACAGCGGTAAGATCCTTGAGAGTTTTCGCCCCGAAGAACGTTTTTCCAATGATGA  
GCACTTTTAAAGTTCTGCTATGTGGCGCGGTATTATCCCCTGTTGACGCCGGCAAGAGCAACTCGGTGCGCCGCATACT  
ATTCTCAGAATGACTTGGTTGAGTACTACCAGTCACAGAAAAGCATCTTACGGATGGCATGACAGTAAGAGAATTATGCAG  
TGCTGCCATAACCATGAGTGATAAACACTGCGGCCAACTTACTTCTGACAACGATCGGAGGACCGAAGGAGCTAACCGCTTT  
TTTGACAACATGGGGGATCATGTAACCTGCCTTGATCGTTGGAAACCGGAGCTGAATGAAGCCATACCAAACGACGAGC  
GTGACACCACGATGCCTGTAGCAATGGCAACAACGTTGCGCAAACTATTAACCTGGCGAACTACTTACTAGCTTCCCGGC  
AACAAATTAAGACTGGATGGAGGCGGATAAAGTTGCAGGACCACTTCTGCGCTCGGCCCTTCCGGCTGGCTGGTTTATTG  
CTGATAAATCTGGAGCCGGTGAGCGTGGGTCTCGCGGTATCATTGCAGCACTGGGGCCAGATGGTAAGCCCTCCCGTATC  
GTAGTTATCTACACGACGGGGAGTCAGGCAACTATGGATGAACGAAATAGACAGATCGCTGAGATAGGTGCCTCACTGATT  
AAGCATTGGTAACTGTGACACCAAGTTTACTCATATATACTTTAGATTGATTTAAAACCTTCATTTTTAAATTTAAAGGATCTAG  
GTGAAGATCCTTTTGATAATCTCATGACCAAAATCCCTTAACGTGAGTTTTCGTTCCACTGAGCGTCAGACCCCGTAGAAA  
AGATCAAAGGATCTTCTGAGATCCTTTTTTCTGCGCGTAATCTGCTGCTTGCAAAACAAAAAACACCCGCTACCGAGCGGT  
GGTTTGTGTCGGATCAAGAGCTACCAACTCTTTTTCCGAAGGTAACCTGGCTTCAGCAGAGCGCAGATACCAAACTACTGTT  
CTTCTAGTGTAGCCGTAGTTAGGCCACCACTTCAAGAAGTCTGTAGCACCGCCTACATACCTCGCTCTGCTAATCCTGTTAC  
CAGTGGCTGCTGCCAGTGGCGATAAGTCGTCTTACCGGGTTGGACTCAAGACGATAGTTACCGGATAAGGCGCAGCGG  
TCGGGCTGAACGGGGGGTTCGTGCACACAGCCCAGCTTGGAGCGAACGACCTACACCGAACTGAGATACCTACAGCGTG  
AGCTATGAGAAAAGCGCCACGCTTCCCGAAGGGAGAAAAGCGGACAGGTATCCGGTAAGCGGCAGGGTCGGAACAGGAGA  
GCGCACGAGGGAGCTTCCAGGGGGAAACGCCTGGTATCTTTATAGTCTGTGCGGGTTTCGCCACCTCTGACTTGAGCGTC  
GATTTTTGTGATGCTCGTCAGGGGGGCGGAGCCTATGGAAAACGCCAGCAACGCGGCCCTTTTTACGGTTCCTGGCCTTTT  
GCTGGCCTTTTGTCTACATGTTCTTTCCTGCGTTATCCCCTGATTCTGTGGATAACCGTATTACCGCCTTTGAGTGAGCTGA  
TACCGCTCGCCGACGCCGAACGACCGAGCGCAGCGAGTCAGTGAGCGAGGAAGCGGAAGAGCGCCCAATACGCAAACC  
GCCTCTCCCCGCGCTTGGCCGATTCATTAATGCAGCAAGCTCATGGCTGACTAATTTTTTTTTATTTATGCAGAGGCCGAG  
GCCGCTCGGCCTCTGAGCTATTCCAGAAGTAGTGAGGAGGCTTTTTTGGAGGCCTAGGCTTTTGCAAAAGCTCCCCGT  
GGCACGACAGGTTTCCGACTGGAAGCGGGCAGTGAGCGCAACGCAATTAATGTGAGTTAGCTCACTCATTAGGCACCC  
CAGGCTTTACACTTTATGCTTCCGGCTCGTATGTTGTGTGGAATTGTGAGCGGATAACAATTTACACAGGAAAACAGCTATG  
ACATGATTACGAATTTACAAAATAAAGCATTTTTTCACTGCATTCTAGTTGTGGTTTGTCCAAACTCATCAATGTATCTTATC  
ATGCTCGGATCAACTGGATAACTCAAGCTAACCAAAATCATCCCAAACCTCCACCCCATACCTATTACCACTGCCAATTA  
CCTGTGGTTTCATTTACTCTAAACCTGTGATTCTCTGAATATTTTTCATTTTAAAGAAATGTATTTGTTAAATATGTACTACA  
AACTTAGTAGT

**Supplementary Figure 27: Uncropped versions of all gel images.** The approximate regions of the cropped area as shown in the prepared figures is indicated with a blue box.

**Supplementary Figure 5c**

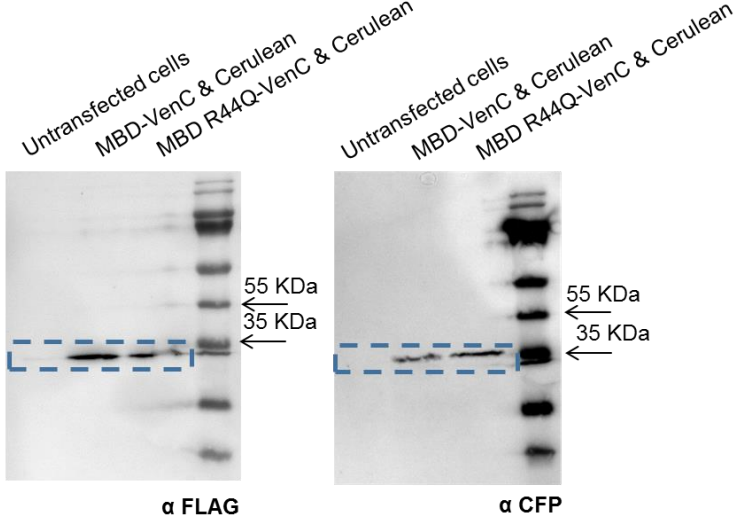

**Supplementary Figure 16a**

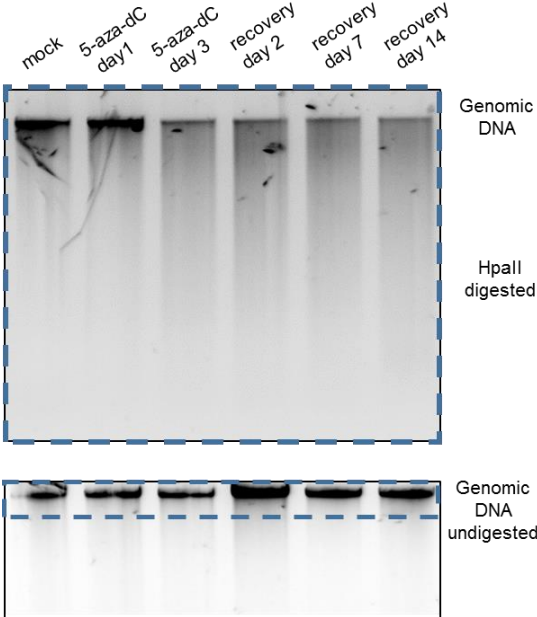

The position of the gel loading dye front and periodic checking under the UV lamp were used to decide when to stop the gel. No size marker was used here.

### Supplementary Figure 17a

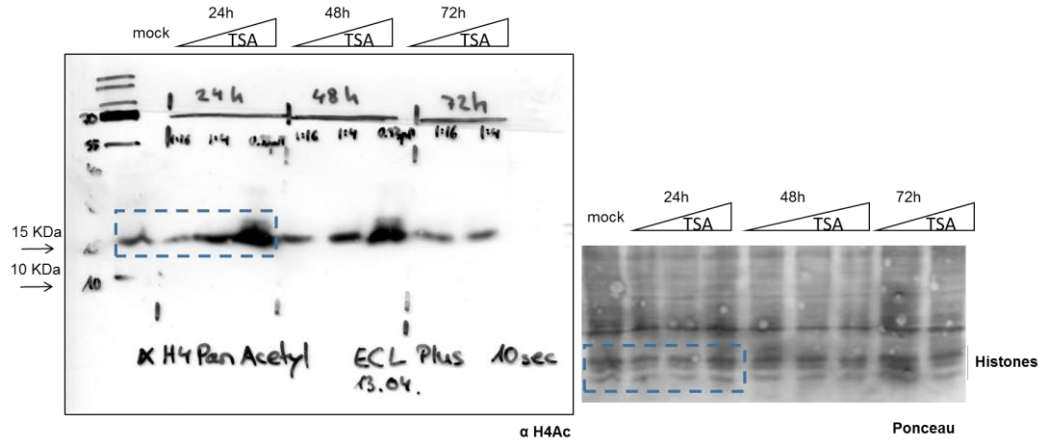

### Supplementary Figure 17b

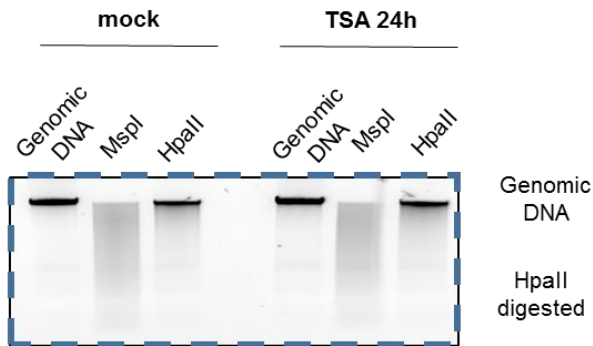

### Supplementary Figure 24c

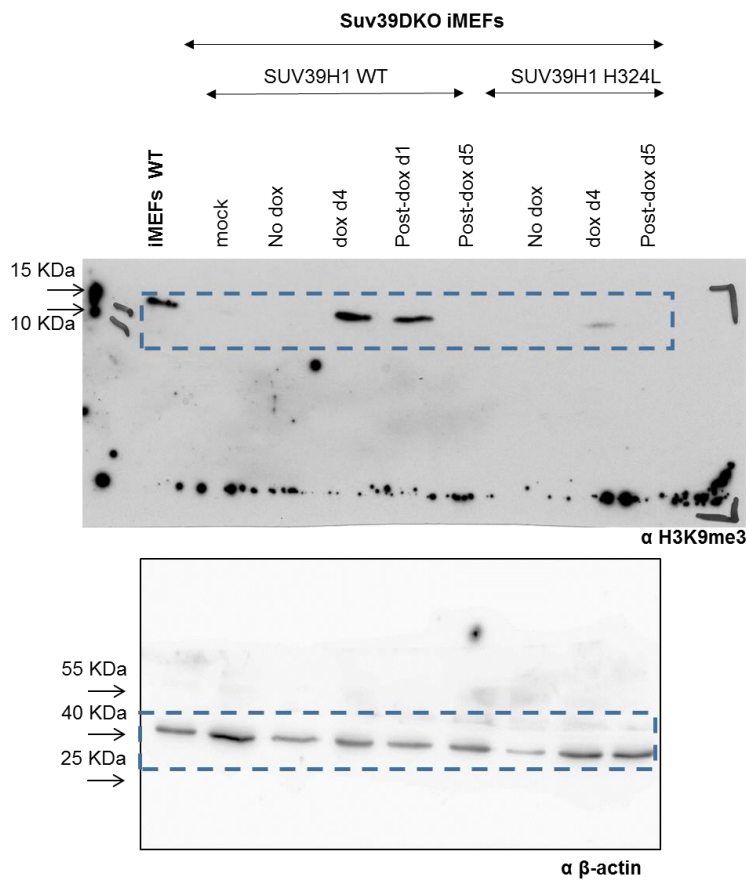

**Supplementary Figure 25b**

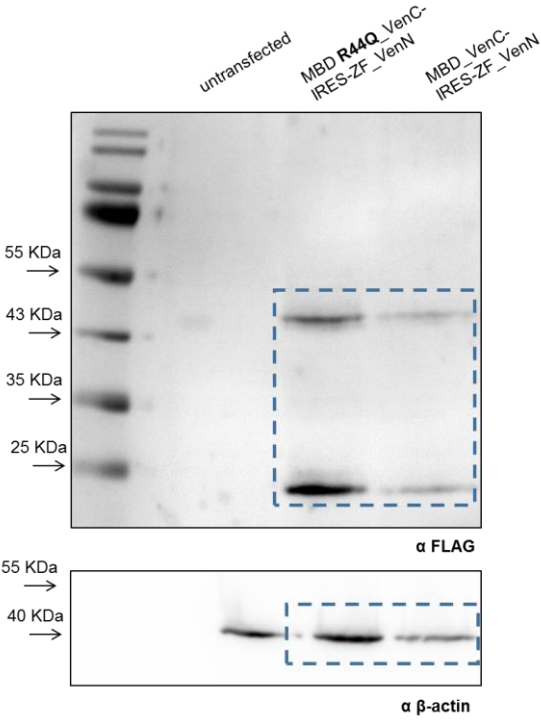

## Supplemental Tables

Supplementary Table 1: BiFC assays setup for the BiAD sensor 1

| Cell line                                                    | Transfection reagent | Total plasmid amount [ng] | ZF anchor amount [ng] | MBD detector amount [ng] | Related to Figure #                          |
|--------------------------------------------------------------|----------------------|---------------------------|-----------------------|--------------------------|----------------------------------------------|
| NIH 3T3                                                      | Fugene HD            | 2000                      | 50                    | 50                       | Fig. 2b                                      |
| iMEF WT                                                      | GenaxxonFect         | 2500                      | 50                    | 50                       | Fig. 2a, d; Supplementary Figs.3, 4, 6 and 9 |
| iMEF Suv39DKO                                                | GenaxxonFect         | 2500                      | 50                    | 50                       | Supplementary Fig. 9                         |
| iMEF <i>P53</i> <sup>-/-</sup>                               | Lipofectamine 3000   | 2500                      | 50                    | 50                       | Fig. 2c; Supplementary Fig. 3b               |
| iMEF <i>P53</i> <sup>-/-</sup> / <i>Dnmt1</i> <sup>-/-</sup> | Lipofectamine 3000   | 2500                      | 50                    | 50                       | Fig. 2c, d; Supplementary Figs. 3b and 8     |

Supplementary Table 2: BiFC assays setup for the BiAD sensor 2

| Cell line                          | Transfection reagent | Total plasmid amount [ng] | TALE anchor amount [ng] | MBD detector amount [ng] | Related to Figure #                                                |
|------------------------------------|----------------------|---------------------------|-------------------------|--------------------------|--------------------------------------------------------------------|
| HEK293                             | Fugene HD            | 2000                      | 50                      | 500                      | Figs. 3, 4d, e and Supplementary Figs. 3b, 12, 13b, 14, 17c and d; |
| HCT116 WT                          | Lipofectamine 3000   | 2500                      | 100                     | 1000                     | Fig. 4a, c                                                         |
| HCT116 <i>DNMT1</i> <sup>-/-</sup> | Lipofectamine 3000   | 2500                      | 100                     | 1000                     | Fig. 4b, c                                                         |

Supplementary Table 3: BiFC assays setup for the BiAD sensor 3

| Cell line | Transfection reagent | Total plasmid amount [ng] | dCas9 anchor amount [ng] | guide RNA amount [ng] | MBD detector amount [ng] | Related to Figure #             |
|-----------|----------------------|---------------------------|--------------------------|-----------------------|--------------------------|---------------------------------|
| HEK293    | Fugene HD            | 2000                      | 250                      | 750                   | 250                      | Fig.5 and Supplementary Fig. 19 |



**Supplementary Table 4: BiFC assays setup for the BiAD sensor 4**

| Cell line                         | Transfection reagent | Total plasmid amount [ng] | ZF anchor amount [ng] | HP1CD detector amount [ng] | Related to Figure #                           |
|-----------------------------------|----------------------|---------------------------|-----------------------|----------------------------|-----------------------------------------------|
| iMEF WT                           | GenaxxonFect         | 2500                      | 250                   | 750                        | Fig. 6a, c and Supplementary Figs. 22, 23c, d |
| iMEF Suv39DKO                     | GenaxxonFect         | 2500                      | 250                   | 750                        | Fig. 6b, c; and Supplementary Fig. 22a        |
| iMEF Suv39DKO + Tet-SUV39H1 WT    | GenaxxonFect         | 2500                      | 250                   | 750                        | Fig. 6b, c                                    |
| iMEF Suv39DKO + Tet-SUV39H1 H324L | GenaxxonFect         | 2500                      | 250                   | 750                        | Fig. 6b, c                                    |

**Supplementary Table 5: Settings used for fluorophore imaging**

| Fluorophore                | Lase line for excitation [nm] | Emission collection window [nm] |
|----------------------------|-------------------------------|---------------------------------|
| DAPI/mCerulean             | 405                           | 418-573                         |
| LSSmKate2                  | 488                           | 595-731                         |
| mVenus/ BiFC               | 514                           | 525-602                         |
| Alexa 594/ mRuby2/ mCherry | 561                           | 595-731                         |

**Supplementary Table 6: Number of counted cells for graphs shown in Figures 2-7 & Supplementary Figs. 9, 17 and 23**

| BiAD sensor                       | Cell line                                         | Detector domain variant | Drug treatment/<br>Exogenous expression of epigenetic enzyme | Number of counted cells per replicate | Related to Figure #    |
|-----------------------------------|---------------------------------------------------|-------------------------|--------------------------------------------------------------|---------------------------------------|------------------------|
| 1                                 | iMEF WT                                           | MBD WT                  | not treated                                                  | 20-30                                 | Fig. 2d                |
|                                   |                                                   | MBD R44Q                | not treated                                                  | 20-30                                 |                        |
|                                   | iMEF <i>P53<sup>-/-</sup>/Dnmt1<sup>-/-</sup></i> | MBD WT                  | not treated                                                  | 20-30                                 | Supplementary Fig. 9b  |
|                                   | iMEF WT                                           | MBD WT                  | not treated                                                  | 15-20                                 |                        |
| iMEF Suv39DKO                     | MBD WT                                            | not treated             | 15-20                                                        |                                       |                        |
| 1, stable integration             | MBD_VenC-IRES-ZF_VenN                             | MBD WT                  | 5-aza-dC/ mock                                               | 25-45 per time point                  | Fig. 7c                |
| 2                                 | HEK293                                            | MBD WT                  | not treated                                                  | 40-60                                 | Fig. 3d                |
|                                   | HEK293                                            | MBD R44Q                | not treated                                                  | 40-60                                 |                        |
|                                   | HEK293                                            | MBD WT                  | 5-aza-dC/ mock                                               | 20-60 per time point                  | Fig. 4c                |
|                                   | HEK293                                            | MBD WT                  | mock                                                         | 15-20                                 | Supplementary Fig. 17d |
|                                   | HEK293                                            | MBD WT                  | TSA                                                          | 15-20                                 |                        |
|                                   | HCT116 WT                                         | MBD WT                  | not treated                                                  | 20-30                                 | Fig. 4e                |
|                                   | HCT116 <i>DNMT1<sup>-/-</sup></i>                 | MBD WT                  | not treated                                                  | 25-35                                 |                        |
|                                   | HCT116 <i>DNMT1<sup>-/-</sup></i>                 | MBD WT                  | DNMT1 WT                                                     | 20-30                                 |                        |
| HCT116 <i>DNMT1<sup>-/-</sup></i> | MBD WT                                            | DNMT1 C1226A            | 20-40                                                        |                                       |                        |
| 3                                 | HEK293                                            | MBD WT                  | not treated                                                  | 15-20                                 | Fig. 5d                |
|                                   | HEK293                                            | MBD R44Q                | not treated                                                  | 15-20                                 |                        |
|                                   | HEK293                                            | MBD WT                  | 5-aza-dC/ mock                                               | 15-20 per time point                  | Fig. 5f                |
| 4                                 | iMEF WT                                           | HP1CD WT                | not treated                                                  | 20-30                                 | Fig. 6c                |
|                                   | iMEF Suv39DKO                                     | HP1CD WT                | not treated                                                  | 20-30                                 |                        |
|                                   | iMEF Suv39DKO + Tet-SUV39H1 WT                    | HP1CD WT                | Tet-SUV39H1 WT                                               | 15-20                                 |                        |
|                                   | iMEF Suv39DKO + Tet-SUV39H1 H324L                 | HP1CD WT                | Tet-SUV39H1 H324L                                            | 15-20                                 |                        |
|                                   | iMEF WT                                           | HP1CD WT                | not treated                                                  | 20-30                                 | Supplementary Fig. 23d |
| HP1CD W42A                        |                                                   | not treated             | 20-30                                                        |                                       |                        |

**Supplementary Table 7: p values for graphs shown in Figures 2-7 & Supplementary Figs. 9, 17 and 23**

| BiAD sensor           | BiAD variants compared | Cell line background compared                                                         | p value       | Related to Figure #    |
|-----------------------|------------------------|---------------------------------------------------------------------------------------|---------------|------------------------|
| 1                     | MBD WT vs MBD R44Q     | iMEFs                                                                                 | <b>0.0028</b> | Fig. 2d                |
|                       | MBD WT                 | iMEF WT vs iMEF <i>P53<sup>-/-</sup>/Dnmt1<sup>-/-</sup></i>                          | <b>0.0033</b> |                        |
|                       | MBD WT                 | iMEF WT vs iMEF Suv39DKO                                                              | 0.1601        | Supplementary Fig. 9b  |
| 1, stable integration | MBD WT                 | Mock vs 5-aza-dC (day 3)                                                              | <b>0.0006</b> | Fig. 7c                |
|                       | MBD WT                 | Mock vs 5-aza-dC (recovery day 1)                                                     | <b>0.0023</b> |                        |
| 2                     | MBD WT vs MBD R44Q     | HEK293                                                                                | <b>0.0043</b> | Fig. 3d                |
|                       | MBD WT                 | HCT116 WT vs HCT116 <i>DNMT1<sup>-/-</sup></i>                                        | <b>0.0022</b> | Fig. 4c                |
|                       | MBD WT                 | HCT116 <i>DNMT1<sup>-/-</sup></i> vs HCT116 <i>DNMT1<sup>-/-</sup></i> + DNMT1 WT     | <b>0.0047</b> |                        |
|                       | MBD WT                 | HCT116 <i>DNMT1<sup>-/-</sup></i> vs HCT116 <i>DNMT1<sup>-/-</sup></i> + DNMT1 C1226A | 0.2285        |                        |
|                       | MBD WT                 | Mock vs 5-aza-dC (day 3)                                                              | <b>0.0017</b> | Fig. 4e                |
|                       | MBD WT                 | Mock vs 5-aza-dC (recovery day 14)                                                    | <b>0.0110</b> |                        |
|                       | MBD WT                 | Mock vs TSA                                                                           | 0.0766        | Supplementary Fig. 17d |
| 3                     | MBD WT vs MBD R44Q     | HEK293                                                                                | <b>0.0017</b> | Fig. 5d                |
|                       | MBD WT                 | Mock vs 5-aza-dC (day 3)                                                              | <b>0.0001</b> | Fig. 5f                |
| 4                     | HP1CD WT               | iMEF WT vs iMEF Suv39DKO                                                              | <b>0.0012</b> | Fig. 6c                |
|                       | HP1CD WT               | iMEF Suv39DKO vs iMEF Suv39DKO + Tet-SUV39H1 WT                                       | <b>0.0136</b> |                        |
|                       | HP1CD WT               | iMEF Suv39DKO vs iMEF Suv39DKO + Tet-SUV39H1 H324L                                    | 0.2712        |                        |
|                       | HP1CD WT vs HP1CD W42A | iMEF                                                                                  | <b>0.0009</b> | Supplementary Fig. 23d |

\* Comparisons with p > 0.05 are considered not significant. p-values < 0.05 are printed in bold.

**Supplementary Table 8: Primers used for amplicon-targeted bisulfite sequencing**

| Cell line                         | Fw primer (5' - 3')                                  | Rv primer (5' - 3')                            |
|-----------------------------------|------------------------------------------------------|------------------------------------------------|
| HEK293                            | <u>CAGATCGTTATTGGATATTTGGAGTATTTTGA</u><br>GGTTTATGG | <u>CAGTACAAACCATCCTAACTAACAAAATAAA</u><br>ACCC |
| HCT 116                           | <u>ACATGTGTTATTGGATATTTGGAGTATTTTGA</u><br>GGTTTATGG | <u>ACTAGTAAACCATCCTAACTAACAAAATAAA</u><br>ACCC |
| HCT116 <i>DNMT1<sup>-/-</sup></i> | <u>CTTGTAGTTATTGGATATTTGGAGTATTTTGA</u><br>GGTTTATGG | <u>CTGTTAAAACCATCCTAACTAACAAAATAAA</u><br>ACCC |

Underlined nucleotides denote the barcodes used for sample identification.

### Supplementary references

- 1 Arand, J. *et al.* In vivo control of CpG and non-CpG DNA methylation by DNA methyltransferases. *PLoS genetics* **8**, e1002750, doi:10.1371/journal.pgen.1002750 (2012).
- 2 Lu, L. Y., Kuang, H., Korakavi, G. & Yu, X. C. Topoisomerase II Regulates the Maintenance of DNA Methylation. *Journal of Biological Chemistry* **290**, 851-860, doi:10.1074/jbc.M114.611509 (2015).
- 3 Ricci, M. A., Manzo, C., Garcia-Parajo, M. F., Lakadamyali, M. & Cosma, M. P. Chromatin fibers are formed by heterogeneous groups of nucleosomes in vivo. *Cell* **160**, 1145-1158, doi:10.1016/j.cell.2015.01.054 (2015).
